# Gene expression levels of the glycolytic enzymes lactate dehydrogenase A (LDHA) and phosphofructokinase platelet (PFKP) are good predictors of survival time, recurrence and risk of death in cervical cancer.

Verónica Bolaños-Suárez<sup>1</sup>, Ana Alfaro<sup>2</sup>, Ana María Espinosa<sup>3</sup>, Ingrid Medina-Martínez<sup>4</sup>, Eligia Juárez<sup>5</sup>, Nicolás Villegas-Sepúlveda<sup>6</sup>, Marco Gudiño-Zayas<sup>1</sup>, América Gutiérrez-Castro<sup>5</sup>, Edgar Román-Bassaure<sup>7</sup>, María Eugenia Salinas-Nieves<sup>8</sup>, Sergio Bruno-Muñoz<sup>8</sup>, Oscar Flores-Herrera<sup>9</sup>, Jaime Berumen<sup>1\*</sup>.

1.Unidad de Investigación en Medicina Experimental, Facultad de Medicina, Universidad Nacional Autónoma de México, Mexico City, Mexico

2.Anatomía Patológica. Hospital General de México, Dr. Eduardo Liceaga, Mexico City, México.

3.Farmacología Clínica, Hospital General de México, Dr. Eduardo Liceaga, Mexico City, México.

4.Departamento de Bioquímica y Biología Molecular, Facultad de Medicina, Universidad Nacional Autónoma de México, Mexico City, México.

5.Unidad de Medicina Genómica, Hospital General de México. Dr. Eduardo Liceaga Mexico City, México.

6.Departamento de Biomedicina Molecular, Centro de Investigación y Estudios Avanzados del Instituto Politécnico Nacional, Mexico City, México.

7.Servicio de Oncología, Hospital General de México, Dr. Eduardo Liceaga, Mexico City, México.

8.Servicio de Ginecología, Clínica de Colposcopia, Hospital General de México, Dr. Eduardo Liceaga, Mexico City, México.

9.Departamento de Bioquímica, Facultad de Medicina, Universidad Nacional Autónoma de México, Mexico City, México.

**\*Corresponding author:** Unidad de Investigación en Medicina Experimental, Facultad de Medicina, UNAM, Hospital General de México Dr. Eduardo Liceaga, 06720, Mexico City, Mexico, phone: +52 551850-4023.

**e-mail:** [jaimeberumen47@gmail.com](mailto:jaimeberumen47@gmail.com).

**Keywords:** *Lactate dehydrogenase A (LDHA), phosphofructokinase platelet (PFKP), cervical cancer, survival, risk of death.*

## Abstract

Background. Up to 74% of patients with cervical cancer (CC) may experience recurrence after their treatment, and most of them are identified late when only the clinical parameters are used, which decreases their chances of recovery. Molecular markers can improve the prediction of clinical outcome and identify therapeutic targets in CC. Glycolysis is altered in 70% of CCs, so it could be a metabolic pathway in which molecular markers associated with the aggressiveness of CC can be identified.

Methods. The expression of 14 glycolytic genes was analyzed in 118 CC samples by microarrays, and only LDHA and PFKP were validated by qRT-PCR (n=58) and in second and third replicates by Western blotting (n=69) and immunohistochemistry (n=18).

Results. LDHA and PFKP were associated with poor overall survival [OS: LDHA HR=3.0 (95% CI= 1.1-8.2);  $p=2.9 \times 10^{-2}$ ; PFKP HR=3.4 (95% CI= 1.1-10.5);  $p=3.5 \times 10^{-2}$ ] and disease-free survival [DFS: LDHA HR=2.7 (95% CI= 1.6-6.3);  $p=2.6 \times 10^{-2}$ ] independent of FIGO clinical stage. The risk of death was greater when both biomarkers were overexpressed than when using only FIGO stage [HR =7 (95% CI 1.6-31.1,  $p=1.0 \times 10^{-2}$ ) versus HR=8.1 (95% CI=2.6-26.1;  $p=4.3 \times 10^{-4}$ )] and increased exponentially as the expression of LDHA and PFKP increased.

Conclusions. LDHA and PFKP at the mRNA and protein levels were associated with poor overall survival, disease-free survival and increased risk of death of patients with CC regardless of FIGO stage. The measurement of expression of these two markers could be very useful to evaluate the clinical evolution and the risk of death from CC and to make better therapeutic decisions at the beginning of treatment.

64

## 65 **1. Background**

66 Cervical cancer (CC) is the fourth most common cancer in women worldwide [1]  
 67 Persistent infection with human papillomavirus (HPV), particularly high-risk oncogenic  
 68 viruses, is the main etiological agent for the development of CC. Despite early  
 69 detection programs and vaccinations against the most oncogenic HPVs [2], it is  
 70 estimated that 569,000 new cases occur each year and cause 311,365 deaths  
 71 worldwide [1], indicating that CC continues to be a major health problem, mainly in  
 72 developing countries where most cases occur.

73 Treatment of CC includes surgery, radiotherapy and chemotherapy, which depend on  
 74 the clinical stage of the disease [3]. However, it is estimated that a significant  
 75 percentage of patients have pelvic recurrence (10-23% in stage IB-IIB and 42-74% in  
 76 stage III-IVA) or metastases (16-26% in stage IB-IIB and 39-75% in stage III-IVA)  
 77 after treatment, and when this occurs, the patients often have poor survival [4] , [5]. In  
 78 addition, only 32% of patients with recurrent disease are identified early (before 6  
 79 months) during medical follow-up, which decreases the chance of recovery and the  
 80 survival time [6]. Although the clinical International Federation of Gynecology and  
 81 Obstetrics (FIGO) stage, the clinical characteristics of the tumor, metastasis to lymph  
 82 nodes and parametrial invasion are predictors of recurrence and survival time, there  
 83 are no molecular markers approved for clinical use that predict the clinical evolution  
 84 of patients with CC. Molecular markers alone or in conjunction with clinical data  
 85 improve the prediction of the clinical outcome and facilitate better therapeutic  
 86 decision-making, as has been demonstrated in colorectal [7] and breast [8] cancers.

87 Since glycolysis is increased in 70% of human cancers, with lactate production even  
 88 in the presence of oxygen (Warburg effect) [9][10], it can be used to identify new

89 prognostic biomarkers in CC. In fact, the usefulness of several genes or proteins  
 90 involved in glycolysis has been investigated to evaluate survival and aggressiveness  
 91 in CC, such as glucose transporter 1 (GLUT1) [11], hexokinase 2 (HK2) [12],  
 92 phosphofructokinase isoform M (PFKM) (as part of a genetic profile)[13] and total  
 93 lesion glycolysis (TLG), a parameter measurable through positron emission  
 94 tomography (PET) [14]. However, the predictive efficacy of these biomarkers either  
 95 has not been reported or has been reported to be intermediate. Perhaps PET is the  
 96 most efficient method; however, it is very expensive. On the other hand, it would be  
 97 desirable to identify molecular therapeutic targets in CC since the antitumor strategy  
 98 with specific target drugs is showing great benefit in many tumor types with a marked  
 99 decrease in side effects [15].

100 In a previous study, our group found a glycolytic gene profile in CC associated with a  
 101 decrease in survival [16]. In this paper, we investigate which genes of that glycolytic  
 102 expression profile are most highly associated with survival and tumor aggression in  
 103 CC. Of the genes finally identified, the mRNA and protein levels of lactate  
 104 dehydrogenase A (LDHA) and phosphofructokinase platelet (PFKP) were explored in  
 105 a main discovery sample of 118 CCs, and they were validated in two additional  
 106 replicates (n = 58 and 69 CCs) and in 18 CC tissues preserved in paraffin. These two  
 107 markers allow to evaluate of the clinical evolution and mortality of patients with CC  
 108 regardless of the FIGO stage.

## 109 **2. Materials**

### 110 **Ethical consent**

111 The study protocol was approved by the Scientific and Ethics Committee of the  
 112 General Hospital of Mexico (HGM) (approval number DIC/03/311/04/051). This study,  
 113 all experiments and analyses were performed in accordance with the Declaration of

Helsinki [17]. Written informed consent was obtained from all participants before their inclusion in the study.

### **Patient selection and clinical characteristics**

The study included 188 patients with CC (Supplementary Figure 1, Supplementary Table 1), 10 patients with high-grade epithelial lesions (HG-CINs) and 36 women with healthy cervical epithelium (HCE) evaluated in the Departments of Oncology and Gynecology and Obstetrics of the HGM. Patients with CC were selected from a previous study that included 462 patients recruited from November 2003 to April 2005 and from January 2006 to July 2007 [18]. The inclusion criteria were as follows: patients diagnosed with invasive CC, without previous treatments. Only patients from whom high-quality RNA and tumor biopsies had more than 70% tumor cells were included in the present study. The exclusion criteria were insufficient quality of the biological sample. All patients received complete clinical evaluation and were treated with surgery, radiation, chemotherapy, or a combination of these according to American Cancer Society guidelines. Tumor staging was performed in accordance with the latest International Federation of Gynecology and Obstetrics (FIGO) protocol for gynecological cancer [19]. The average age of the patients was 51 years, with a range of 23 to 89 years. After their treatment, they were followed up and evaluated periodically at the HGM. HCE were obtained from patients who underwent hysterectomy for myomatosis with a normal cervix for cytology and colposcopy as described previously [18]. The tissues were frozen in liquid nitrogen and stored at -80°C.

### **RNA isolation**

Total RNA from the samples was extracted with TRIzol™ reagent (Invitrogen, Carlsbad CA, USA) according to the manufacturer's instructions. RNA integrity was

verified by agarose gel electrophoresis, determining the presence of 18S and 28S ribosomal RNA.

## Glycolytic gene expression and data analysis

The glycolysis gene expression of 76 CC, 10 HG-CIN and 17 HCE tissues was examined using a Human Gene 1.0ST (HG-1.0ST) microarray and with the Human Gene Focus (HG-Focus) microarray in 42 CCs and 12 HCE (Affymetrix, Santa Clara, CA). Gene expression was obtained from two studies previously published by our working group in the Gene Expression Omnibus (GEO) database with accession numbers GSE52904 [16] and GSE39001 [18]. See supplementary text 1.

## Quantitative PCR (qRT-PCR)

cDNA was synthesized using the High-Capacity cDNA Transcription Kit (Applied Biosystems) using 5 µg of RNA according to the manufacturer's protocol. Gene expression of *LDHA*, *PFKP* and an internal control (*RPS13*) was measured in 58 CC and 19 HCE by qRT-PCR and TaqMan gene expression assays were used (*LDHA*, Hs00855332\_g1; *PFKP*, Hs00242993\_m1; *RPS13*, HS 01011487\_g1; Applied Biosystem Inc.). The experiments were run in triplicate in a final volume of 20 µL, including 200 ng of cDNA template using the TaqMan® Universal PCR Master Mix (4304437, Applied Biosystems), according to the manufacturer's instructions. The expression of the *LDHA* and *PFKP* genes was normalized in each tumor and control sample with *RPS13* using as previously reported [18]. The FC in expression was calculated by dividing the median normalized intensity of each tumor sample by the median normalized intensity of the whole control samples.

## Western blot (WB)

*LDHA* and *PFKP* protein expression was determined using WB in 69 CC samples. 25 ng of protein was resolved on 8% SDS-PAGE and electrotransferred onto a

nitrocellulose membrane and incubated with a mouse monoclonal antibodies anti-human LDHA (H-10: sc-133123; 1:1,000) or PFKP (F-7: sc-514824; 1:200) and goat  $\beta$ -actin antibody (I-19: sc-1616), (Santa Cruz Biotechnology, Inc.) overnight at 4°C. The membranes were then incubated with horseradish peroxidase (HRP)-conjugated secondary antibodies (anti-mouse IgG + IgM (H+L) antibodies; 1:10,00; Jackson ImmunoResearch Laboratories, Inc.) and anti-goat IgG-HRP (sc-2354; 1:1,000; Santa Cruz Biotechnology, Inc.) for 1 h at room temperature. Prestained Broad Range SDS-PAGE Standards (BIO-RAD, CA) were used for molecular weight estimation on gels.  $\beta$ -actin was used as an internal control. Loading buffer without sample was used as negative control. The immunoreactive proteins were developed using the SuperSignal™ Chemiluminescent HRP Kit (Thermo Fisher Scientific). Densitometric analysis was performed with ImageJ (NIH, Bethesda, MD). The optical density was calculated as OD=Log 10 (255/pixel value).

## **Immunohistochemistry (IH)**

The protein expression of LDHA and PFKP was determined in 18 CC, 12 HCE and 6 metastatic samples by IH. Human paraffin-embedded tissue samples were collected at the Pathology Department of HGM from patients evaluated from January 2008 to March 2013. The inclusion criteria were women with CC at any FIGO stage whose diagnostic biopsy was taken prior to treatment, with complete clinical data available, and with follow-up data of at least 24 months after treatment. All patients received complete clinical evaluation according to the ACS guidelines. Clinicopathological information was collected from medical records. Tissue microarrays (TMAs) were built as previously described [18]. The TMA included kidney tumor tissue as a positive control, which was previously determined to present high LDHA and PFKP expression ([www. proteinatlas.org](http://www.proteinatlas.org)). IH was performed with the Ultra Streptavidin (USA) HRP Detection Kit (Multi-Species) (BioLegend, CA) according to the

manufacturer's instructions. The following mouse monoclonal antibodies were used: LDH (H-10) sc-133123 (1:200) and PFKP (F-7) sc-514824 (1:100) from Santa Cruz Biotechnology (Santa Cruz, CA). Antigen-antibody complexes were detected using the avidin-biotin peroxidase method, with 3,3'-diaminobenzidine-tetrahydrochloride as a chromogenic substrate (DAB Chromogen Concentrate, BioLegend, CA), and the sections were counterstained with hematoxylin. Assays were performed in triplicate.

### **Quantitative image analysis**

Each tissue of the TMA was photographed in triplicate with a magnification of 400X using a Nikon Microphot FXA. The digital images were analyzed with ImageJ as previously described [20] and the intensity of DAB signal was transformed to optical density values:  $OD = -\log(255 \times \text{maximum level pixels} / \text{average pixels})$ . The integrated optical density (DOI) was calculated as  $OD \times \text{staining area}$ .

### **Survival analysis**

After the treatment was completed, each patient was clinically evaluated every 3 or 6 months by an experienced oncologist. Clinical data of the follow-up study were obtained from the patient's medical record. Additionally, a social worker performed phone calls and home visits to the patients every 6 months during the study. Survival analysis was performed on all patients who received the full treatment. The mean follow-up time was 60 months after the initial diagnosis. The patients designated as censored referred to patients who were lost to follow-up or who died from causes other than CC. Patients were considered lost when they did not attend medical appointments for disease control, were not found at home visits or did not answer phone calls. In this cohort, alive status was registered at the last follow-up, and death was caused by a primary tumor of CC as a main cause and confirmed by the medical record and the death certificate.

### **Statistical analysis**



Data analysis was performed using SPSS software ver. 20. Receiver operating characteristic (ROC) curve analysis was performed, and the Youden index was used [21] to select the best cutoff points to distinguish tumors from nonsurviving and surviving patients or patients who survived with and without the disease using the expression values of glycolysis genes obtained by microarrays, qRT-PCR and WB. Expression values equal to or above the cutoff were considered upregulated, and those with values below the cutoff were considered downregulated.

The comparisons of the overall survival (OS) and disease-free survival (DFS) times between patients with upregulated and downregulated tumor genes were calculated by the Kaplan–Meier method and analyzed by the log-rank test. FIGO staging and glycolysis gene expression were included in univariate and multivariable Cox proportional hazards regression models. All tests were 2-sided, and *p* values less than 0.05 were considered statistically significant.

### **3. Results**

#### **Analysis of glycolytic gene expression in CC**

The expression of genes involved in glycolysis included in the HG-1.0ST microarray was analyzed in 103 cervical samples, including 76 CC, 10 HG-CINs and 17 HCE. As shown in Supplementary Figure 2, the 14 genes had significantly higher expression levels in the invading CCs than in the controls. Interestingly, we were able to confirm the difference between the invading cancers and the control group for 9 of these genes (SLC2A1, HK2, PFKP, ALDOA, GAPDH, PGK1, ENO, PKM and LDHA) in a second replicate with 42 invasive CCs and 12 controls, explored with a second microarray (HG-Focus; see Supplementary Figure 3), which included only 9 of the 14 formerly explored genes. The samples were distributed into 3 groups, according to the expression profile, in the hierarchical clustering analysis: upregulation (group 3); intermediate regulation (group 2), which could be divided into the intermediate downregulation subgroup (group 2A) and the high intermediate upregulation

subgroup (group 2B); and downregulation (group 1). Group 3, in which most genes were overexpressed in all samples, was composed only of CC (n=28) and the 3 CC-derived cell lines (HeLa, SiHa and CaSki). In contrast, in group 1, in which the glycolysis genes were not overexpressed, almost all controls were found (n=13, 76.5%), along with 4 of the 10 HG-CINs and a group of 15 CCs (19.7%). Group 2B, like group 3, was composed only of CC, while group 2A, more like group 1, was composed of HCE, HG-CINs and CCs (Figure 1, Supplementary Table 2). In the hierarchical grouping with the samples explored with HG-Focus, the distribution of the CCs and controls was very similar to the distribution obtained with the HG-1.0ST data (Supplementary Figure 4, Supplementary Table 2). Interestingly, the frequency of CCs with the highest clinical stage ( $\geq$  stage IIIA) predominated in group 3 (58.4%), while those with lower clinical stages ( $\leq$  stage IIB) were distributed uniformly among the 4 groups ( $p=5.0 \times 10^{-2}$ , chi-square test) (Supplementary Table 2).

### **Effect of the gene expression of the 14 glycolysis genes on survival**

Interestingly, the expression profile of the 14 genes explored significantly influences the survival of patients with CC. Almost all women with CC (95%) whose tumors did not overexpress glycolysis genes (groups 1 and 2A) survived more than 5 years. In contrast, only 55% of patients with CC who had a glycolysis overexpression profile (groups 2B and 3) survived more than 5 years (Supplementary Figure 5A), although the difference between the two groups presented marginal statistical significance ( $p=5.0 \times 10^{-2}$ , log-rank test). To investigate which genes, contribute most significantly to that profile, survival was analyzed separately for each gene. Of the 14 genes identified with the HG-1.0ST microarray, the overexpression of only 8 of them (GAPDH, PGK1, TPI1P1, LDHA, ALDO, PFKP, ENO, and GPI) significantly reduced the % OS of the patients, with  $p$  values ranging from  $p=1.0 \times 10^{-4}$  to  $p=1.3 \times 10^{-2}$  in the log-rank test (Supplementary Figure 5B, C, D, E, F, G, H, and I). In addition, 5 of

them (GPI, PFKP, TPI1P1, GAPDH, and LDHA) were also associated with a significant reduction in % DFS (Supplementary Figure 5J-O). Of the 9 genes explored with HG-Focus, the gene expression levels of only 3 of them (ALDO, PGK1 and LDHA) were also significantly associated with the reduction in % OS ( $p = 3.3 \times 10^{-2}$ ,  $p = 9.0 \times 10^{-3}$ , and  $p = 5.0 \times 10^{-2}$ , respectively, log-rank test), and only 1 (LDHA;  $p = 3.0 \times 10^{-2}$ , log-rank test) was also associated with DFS (see Supplementary Figure 6).

To determine whether the overexpression of these genes is independent of clinical stage, both variables were analyzed in a multivariate Cox proportional hazards model. Due to the small number of patients (n=61), they were grouped into two clinical groups, group 1 ( $\leq$  stage IIA, n=29) and group 2 ( $\geq$  stage IIB, n=32). Univariate analysis showed that the risk of death (hazard ratio, HR) of patients in group 2 was 3.4 (95% confidence interval (CI) = 1.1-10.4;  $p = 3.6 \times 10^{-2}$ , Cox test; Table 1) times higher than that of patients in group 1. As expected, the overexpression of 7 of the 8 genes conferred an increased risk of death, ranging from an HR of 2.8 (95% CI 1.0-7.6;  $p = 3.7 \times 10^{-2}$ ) for the PGK1 gene to an HR of 9.2 (95% CI = 1.2-69.5;  $p = 3.7 \times 10^{-2}$ ) for the ENO1 gene (see Table 1).

However, when explored in conjunction with FIGO stage in multivariate analysis, only the LDHA gene with an HR of 3.0 (95% CI =1.1-8.2;  $p = 2.9 \times 10^{-2}$ ), the PFKP gene with an HR of 3.4 (95% CI = 1.1-10.5;  $p = 3.5 \times 10^{-2}$ ) and the pseudogene TPI1P1 with an HR of 2.6 (95% CI = 1.0-7.9;  $p = 4.0 \times 10^{-2}$ ) conferred an increased risk of death, regardless of the FIGO clinical stage (Table 1). When DFS was analyzed, only LDHA with an HR of 2.7 (95% CI = 1.1-6.2;  $p = 2.9 \times 10^{-2}$ ) was independent of FIGO stage (Supplementary Table 3). LDHA experimental findings were also confirmed with the HG-Focus data (see Supplementary Tables 4 and 5).

## Validation of LDHA and PFKP expression at the mRNA and protein levels

The gene expression of the LDHA and PFKP genes was validated by qRT-PCR, WB, and IH. qRT-PCR confirmed that the expression of both genes was higher in the invading CCs (n=58) than in the HCE (n=19). However, the difference was much greater for the LDHA (FC=100.3;  $p=9.8 \times 10^{-8}$ , Mann-Whitney test) than for PFKP gene (FC=4.3,  $p=2.0 \times 10^{-6}$ , Mann-Whitney test, Figure 2A). Interestingly, we found that the expression levels of LDHA and PFKP were in average 1.6 and 1.7 times higher, respectively, in patients who died and/or presented active disease (recurrence) than in those who survived and were cured ( $p=9.0 \times 10^{-3}$  to  $p=2.8 \times 10^{-2}$ ; Mann-Whitney test, see Supplementary Table 6).

In addition, we confirmed the presence of the LDHA and PFKP proteins by WB in 69 CC samples (15 of the 58 tumors explored for RNAs by qRT-PCR and 54 new CCs). LDHA and PFKP proteins were expressed at higher levels in the tumors of patients who did not survive (FC=14.9,  $p=3.0 \times 10^{-3}$  and FC=21.4,  $p=1.8 \times 10^{-3}$ , respectively; Mann-Whitney test) or who survived with the disease (FC=29.1,  $p=1.4 \times 10^{-4}$  and FC=17.2,  $p=1.7 \times 10^{-3}$ , respectively; Mann-Whitney test, Figure 2B-D) compared to tumors of patients who survived or disease-free survival more than 5 years.

Additionally, we analyzed the expression of these glycolytic enzymes by IH in HCE tissues (n=12), CC tissues (n=18) and metastatic tissues (n=6) preserved in paraffin from a new group of patients. LDHA and PFKP expression levels were significantly higher in tumor tissues than in HCE tissues (FC=4.3 for LDHA and FC=27.2 for PFKP); interestingly, the expression levels of both proteins were even higher in cervical metastases than in HCE (FC= 10.4 and 42.7, respectively) see Supplementary Table 7). This suggests that overexpression of LDHA and PFKP could be an important factor not only for tumor progression but also for the development of metastases. Interestingly, we reconfirmed that LDHA expression was higher in patients who had died and/or had active disease than in those who were

cured or survived more than 5 years (see Figure 3A-E and 3K). In contrast, there were not statistically significant differences in the PFKP expression between the groups (See Figure 3F-3J).

### **The LDHA and PFKP genes, at the mRNA or protein level, are good markers of survival in CC**

At both the mRNA (n=58 CC) and protein (n=69) levels, we confirmed that the overexpression of LDHA and PFKP caused a significant decrease in OS and DFS during more than 5 years of follow-up; however, the results were stronger with the analysis of proteins. The analysis of mRNA is shown in Supplementary Table 8 and Figure 4A-C and 4G-I.

At the protein level, we found that the percentage of patients who survived decreased markedly when LDHA or PFKP proteins were overexpressed compared to the group in which these proteins were not overexpressed: 39% vs. 82% and 55% vs. 83% (both  $p < 0.05$ , log-rank test), respectively (see Figure 4D and 4E). Similar results were found when DFS was analyzed (Figure 4J and 4K). Interestingly, when both proteins were overexpressed (LDHA+/PFKP+), OS and DFS decreased dramatically to 29% and 23%, respectively; in contrast, when there was a single overexpressed protein, the survival rate was 64% in patients with and without the active disease, and when neither of these two proteins was expressed, the survival rate was 90% ( $p = 1.0 \times 10^{-3}$  and  $p = 9.2 \times 10^{-5}$ , log-rank test; see Figure 4F and 4L).

With the univariate Cox analysis, the risk of dying was much higher with advanced FIGO stages than with the overexpression of each of the two markers (Table 2). However, when both markers were overexpressed, they confer a greater risk of death than FIGO [HR =7 (95% CI 1.6-31.1,  $p = 1.0 \times 10^{-2}$ ) versus HR=8.1 (95% CI=2.6-26.1;  $p = 4.3 \times 10^{-4}$ ]. Similar figures were seen for DFS (Table 2). Interestingly, in the

multivariate analysis, both genes remained, together with clinical stage, in the models of OS or DFS, indicating that they confer a risk of death independent of FIGO stage, even of similar magnitude or greater than that conferred by FIGO stage when both markers are overexpressed [OS:HR= 6.1 (95% CI=1.3-31.2;  $p=1.8 \times 10^{-2}$ ) vs. HR= 6.6 (95% CI=1.3-32.1;  $p=2.5 \times 10^{-2}$ ) and [DFS:HR= 4.8 (95% CI=1.3-17.8;  $p=1.8 \times 10^{-2}$ ) vs. HR=5.1 (95% CI=1.5-16.6;  $p=7.0 \times 10^{-3}$ )]. In fact, the HR increased exponentially as the level of expression of these markers increased, especially that of LDHA (Figure 2E). In 5 patients, the HR was well above the average HR of 4, reaching an HR value of 12.6 in the patient with an LDHA intensity of 83,538 OD units.

#### 4. Discussion

This is the first study in which it was identified that the overexpression of the LDHA and PFKP genes of the glycolysis pathway, both at the mRNA and protein levels, are good prognostic markers for OS and DFS in patients with CC, independent of FIGO stage. In fact, the risk of death when these two markers are elevated is equal to or greater than that of FIGO stage and increases exponentially with the protein level in the tumor, especially LDHA.

LDHA is part of the enzyme lactate dehydrogenase (LDH), which converts pyruvate into lactate. This enzyme is composed of 4 subunits, which can be A (LDHA), B (LDHB) or a combination of both [22]. Previous studies have shown that the isoforms in which the A subunit predominates favor the conversion of pyruvate into lactate, which stimulates glycolysis instead of oxidative phosphorylation. In contrast, when the B subunit predominates, the reverse happens: lactate is converted to pyruvate and metabolized by the Krebs/oxidative phosphorylation cycle [23]. In this work, we show that in CC, subunit A is overexpressed, which indicates that LDHA favors the

production of lactate and, with it, anaerobic metabolism, which can provide growth advantages to CC. On the other hand, PFKP, an isoform of the enzyme phosphofructokinase 1 (PFK-1), stimulates the activity of glycolysis by catalyzing the formation of fructose 1,6-bisphosphate from fructose 6-phosphate, the first rate-limiting step of glycolysis, and consequently the production of pyruvate. The simultaneous overexpression of PFKP and LDHA makes sense for the tumor, because the concerted action of the two enzymes in CC could rapidly metabolize pyruvate to lactate, producing an acceleration of glycolysis (10-100 times faster than total glucose oxidation in the mitochondria), achieving a large amount of anaerobic ATP. This favors tumor growth and the development of more aggressive invasive tumors.

No studies have assessed the influence of LDHA gene expression on the aggressiveness and survival of patients with CC. A couple of studies focused on LDHA as a part of the tumor gene expression profile associated with metastases [24] and resistance to chemotherapy [25], however, with contradictory results. In the profile associated with resistance to chemotherapy, the LDHA gene was upregulated, while in the profile associated with tumor metastases, the LDHA gene was downregulated. Interestingly, in this last study, tumors FIGO stage  $\leq$  IIB predominated, while in the first study, tumors FIGO stage  $\geq$  IIB predominated. This could suggest that in tumors of greater clinical stage and larger size in which hypoxia probably already exists, anaerobic metabolism predominates, while in early stages with smaller tumor sizes, aerobic metabolism predominates.

On the other hand, several studies have shown that increased serum LDH activity in patients with CC was associated with poor prognosis and decreased OS [26] and DFS [27], with an increased risk of death or recurrence, independent of other clinical factors [28]. However, the limitation of these studies was that they did not



demonstrate whether the quantified LDH levels came specifically from CC or from other tissues, since this enzyme is produced in several tissues.

In several types of tumors (such as squamous cell carcinoma of the skin and melanoma), increased expression of glycolysis genes is associated with increased tumor progression and decreased survival time in patients [29]. In addition, in many types of cancers, it has been observed through PET using fluorodeoxyglucose (FDG) that increased tumor glucose consumption is related to tumor aggressiveness [30]. This phenomenon has also been demonstrated in animal models. For example, in two mouse models of triple-negative breast cancer (TNBC), 4T1 and Py8119, inhibition of glycolysis resulted in reduced tumor growth and metastases, which prolonged mouse survival [31]. In CC cell lines, LDHA silencing has been shown to decrease some neoplastic features *in vitro*. For example, HeLa and SiHa cells decreased colony formation and invasion capacity when the gene is silenced by miR-34a. Interesting, when the activity of miRNA was finished, the activity of LDHA was reactivated at baseline levels favoring cell proliferation and invasion, demonstrating the importance of the expression of this gene for the tumor neoplastic phenotype [32].

Considering the importance of the neoplastic phenotype and tumor metabolism, LDHA could be a promising therapeutic target in CC. Several pharmacological inhibitors for LDHA have previously been reported for use in cancer, and there are currently several studies looking for more selective inhibitors [33] [34]. One of these compounds, gossypol, is being used in clinical trials for the treatment of malignant glioma (NCT00540722 and NCT00390403).

Although there are no PFKP reports in CC, this enzyme has been found to be overexpressed in HeLa cells [35] and related to the activation of tumor survival pathways via P44/42 mitogen-activated protein kinase (MAPK) [36]. Increased PFKP



expression and activity are related to neoplastic activity, metastasis production, and decreased survival in several types of cancer, primarily brain, kidney, and breast cancers [37] , [38]. Other studies have shown that the inhibition of PFKP with specific siRNAs in lung cancer cell lines [37] and murine tumor models of leukemia [39] decreased the expression of the enzyme and glycolysis, glucose, lactic acid and ATP concentrations in the supernatant of cell cultures, as well as tumor growth and progression.

Simultaneous overexpression of PFKP and LDHA has previously been described in breast cancer cell lines (MDA-MB-231), in which PFKP regulation also regulates lactate production. Interestingly, quercetin treatment impaired PFKP-LDHA signaling axis thereby inhibiting aerobic glycolysis and migration and cell invasion *in vitro* by 80% [38], demonstrating that inhibition of both enzymes may be useful in the treatment of cancers in which these enzymes are activated, as in CC.

## 5. Conclusions

The overexpression of the glycolytic enzymes Lactate dehydrogenase A (LDHA) and phosphofructokinase platelet (PFKP) was associated with poor overall and disease-free survival in CC. Overexpression of LDHA and PFKP genes increased the risk of death from CC by 8 times, and this effect was independent of the FIGO clinical stage. In fact, the risk of death from CC increased exponentially as the expression level of these markers, mainly LDHA, increased. The measurement of gene expression of these two markers could be very useful to evaluate the clinical evolution and the risk of death from CC and to make better therapeutic decisions at the beginning of treatment.

## 6. Abbreviations

ADPGK: ADP-dependent glucokinase; ALDOA: aldolase; AUC: area under the curve; CC: cervical cancer; DFS: disease-free survival; EDARADD: EDAR-associated death

domain; ENO1: enolase 1; FIGO: International Federation of Gynecology and Obstetrics; FC: fold change; GPI: glucose-6-phosphate isomerase; GAPDH: glyceraldehyde-3-phosphate dehydrogenase; HG-CIN: high-grade cervical intraepithelial neoplasia; HK2: hexokinase 2; HR: hazard ratio; IH: immunohistochemistry; LDHA: lactate dehydrogenase A; OS: overall survival; PFKP: phosphofructokinase platelet; PGK1: phosphoglycerate kinase; PKM pyruvate kinase M; qRT-PCR: quantitative real-time-polymerase chain reaction; SLC2A1: solute carrier family 2 member 1; SLC9A1: solute carrier family 9 member A1; TP1P1: triosephosphate isomerase 1 pseudogene 1; WB: Western blotting.

## **Declarations**

### **7. Ethics approval and consent to participate**

The study protocol was approved by the Scientific and Ethics Committee of the General Hospital of Mexico (HGM) (approval number DIC/03/311/04/051). This study, all experiments and analyses were performed in accordance with the Declaration of Helsinki. Written informed consent was obtained from all participants before their inclusion in the study.

### **8. Consent for publication**

Not applicable.

### **9. Availability of data and materials**

The datasets GSE52904 and GSE39001 analyzed during the current study are available in the GEO database (<https://www.ncbi.nlm.nih.gov/geo/>) and are available in the NCBI-GEO repository.

<https://www.ncbi.nlm.nih.gov/geo/query/acc.cgi?acc=GSE52904>

<https://www.ncbi.nlm.nih.gov/geo/query/acc.cgi?acc=GSE39001>

476

477

## 478 **10. Competing interests**

479 All authors have completed the ICMJE uniform disclosure form at  
480 [www.icmje.org/coi\\_disclosure.pdf](http://www.icmje.org/coi_disclosure.pdf) and declare: no support from any organization for  
481 the submitted work; no financial relationships with any organizations that might have  
482 an interest in the submitted work in the previous three years; no other relationships or  
483 activities that could appear to have influenced the submitted work.

484

## 485 **11. Funding**

486 This research was conducted with support from the National Council on Science and  
487 Technology (Conacyt) under grant numbers 8135/A1, 24341 (to JB) and Laboratorio  
488 Huella Génica.

## 489 **12. Author contributions**

490 Study concept and design: J.B. and V.B.S. Performed the experiments: V.B.S.,  
491 A.G.C., A.M.E., I.M.M., A.A., and E.J. Analyzed the data and wrote the manuscript:  
492 V.B.S and J.B. Contributed reagents/materials: O.F.H., N.V.S. Analyzed and  
493 interpreted the image data: M.G.Z. Clinically evaluated CC patients: E.R.B.,  
494 M.E.S.N., S.B.M. Provided cervical specimens from these patients: E.R.B., S.B.M. All  
495 authors read and approved the manuscript. All authors gave final approval of the  
496 version to be published.

497

## 498 **13. Acknowledgments**

499 This study was performed as part of the requirements needed to obtain the Ph.D.  
500 degree of VB from Programa de Posgrado en Ciencias Biológicas, Universidad  
501 Nacional Autónoma de México (UNAM) and received a fellowship from CONACYT

(487890). We thank Dr. Valeria Barrón and Biologist Anabell Alvarado for training in some laboratory techniques.

## 8. References

1. Sung H, Ferlay J, Siegel RL, Laversanne M, Soerjomataram I, Jemal A, et al. Global Cancer Statistics 2020: GLOBOCAN Estimates of Incidence and Mortality Worldwide for 36 Cancers in 185 Countries. CA: A Cancer Journal for Clinicians. 2021; 71:209–49.

2. Zhu Y, Wang Y, Hirschhorn J, Welsh KJ, Zhao Z, Davis MR, et al. Human Papillomavirus and Its Testing Assays, Cervical Cancer Screening, and Vaccination. In: Advances in Clinical Chemistry. Academic Press Inc.; 2017. p. 135–92.

3. Marth C, Landoni F, Mahner S, McCormack M, Gonzalez-Martin A, Colombo N. Cervical cancer: ESMO Clinical Practice Guidelines for diagnosis, treatment and follow-up. Annals of Oncology. 2017;28:iv72–83.

4. Friedlander M, Grogan M. Guidelines for the Treatment of Recurrent and Metastatic Cervical Cancer. The Oncologist. 2002;7:342–7.

5. Yoshida K, Kajiyama H, Utsumi F, Niimi K, Sakata J, Suzuki S, et al. A post-recurrence survival-predicting indicator for cervical cancer from the analysis of 165 patients who developed recurrence. Molecular and Clinical Oncology. 2017. <https://doi.org/10.3892/mco.2017.1530>.

6. Duyn A, van Eijkeren M, Kenter G, Zwinderman K, Ansink A. Acta Obstetrica et Gynecologica Scandinavica Recurrent cervical cancer: detection and prognosis. Acta Obstet Gynecol Scand. 2002; 81:351–5.

- 524 7. Sepulveda AR, Hamilton SR, Allegra CJ, Grody W, Cushman-Vokoun AM,  
525 Funkhouser WK, et al. Molecular biomarkers for the evaluation of colorectal cancer:  
526 Guideline from The American Society for Clinical Pathology, College of American  
527 Pathologists, Association for Molecular Pathology, and the American Society of  
528 Clinical Oncology. *Journal of Clinical Oncology*. 2017; 35:1453–96.
- 529 8. Van Poznak C, Somerfield MR, Bast RC, Cristofanilli M, Goetz MP, Gonzalez-  
530 Angulo AM, et al. Use of biomarkers to guide decisions on systemic therapy for  
531 women with metastatic breast cancer: American Society of Clinical Oncology clinical  
532 practice guideline. *Journal of Clinical Oncology*. 2015; 33:2695–704.
- 533 9. Gatenby RA, Gillies RJ. Why do cancers have high aerobic glycolysis? *Nature*  
534 *Reviews Cancer*. 2004; 4:891–9.
- 535 10. Altenberg B, Greulich KO. Genes of glycolysis are ubiquitously overexpressed in  
536 24 cancer classes. *Genomics*. 2004; 84:1014–20.
- 537 11. Huang X-Q, Chen X, Xie X-X, Zhou Q, Li K, Li S, et al. Co-expression of CD147  
538 and GLUT-1 indicates radiation resistance and poor prognosis in cervical squamous  
539 cell carcinoma. *Int J Clin Exp Pathol*. 2014; 7:1651–66.
- 540 12. Huang X, Liu M, Sun H, Wang F, Xie X, Chen X, et al. Original Article HK2 is a  
541 radiation resistant and independent negative prognostic factor for patients with locally  
542 advanced cervical squamous cell carcinoma. 2015.
- 543 13. Cai L, Hu C, Yu S, Liu L, Yu X, Chen J, et al. Identification and validation of a six-  
544 gene signature associated with glycolysis to predict the prognosis of patients with  
545 cervical cancer. *BMC Cancer*. 2020;20.

14. Scher N, Castelli J, Depeursinge A, Bourhis J, Prior JO, Herrera FG, et al. (18F)-FDG PET/CT parameters to predict survival and recurrence in patients with locally advanced cervical cancer treated with chemoradiotherapy. *Cancer/Radiotherapie*. 2018; 22:229–35.
15. Ke X, Shen L. Molecular targeted therapy of cancer: The progress and future prospect. *Frontiers in Laboratory Medicine*. 2017; 1:69–75.
16. Medina-Martinez I, Barrón V, Roman-Bassaure E, Juárez-Torres E, Guardado-Estrada M, Espinosa AM, et al. Impact of gene dosage on gene expression, biological processes and survival in cervical cancer: A genome-wide follow-up study. *PLoS ONE*. 2014;9.
17. Riis P. Thirty years of bioethics: the Helsinki Declaration 1964-2003. *New Rev Bioeth*. 2003;1:15–25.
18. Espinosa AM, Alfaro A, Roman-Basaure E, Guardado-Estrada M, Palma Í, Serralde C, et al. Mitosis Is a Source of Potential Markers for Screening and Survival and Therapeutic Targets in Cervical Cancer. *PLoS ONE*. 2013;8.
19. Bhatla N, Berek JS, Cuello Fredes M, Denny LA, Grenman S, Karunaratne K, et al. Revised FIGO staging for carcinoma of the cervix uteri. *International Journal of Gynecology and Obstetrics*. 2019; 145:129–35.
20. Ruifrok AC, Katz RL, Johnston A. Comparison of Quantification of Histochemical Staining By Hue-Saturation-Intensity (HSI) Transformation and Color-Deconvolution. 2003.
21. Akobeng AK. Understanding diagnostic tests 3: Receiver operating characteristic curves. *Acta Paediatrica, International Journal of Paediatrics*. 2007; 96:644–7.

- 569 22. Kopperschliger G, Kirchberger J. Methods for the separation of lactate  
570 dehydrogenases and clinical significance of the enzyme. 1996.
- 571 23. Draoui N, Feron O. Lactate shuttles at a glance: From physiological paradigms to  
572 anti-cancer treatments. DMM Disease Models and Mechanisms. 2011;4:727–32.
- 573 24. Huang L, Zheng M, Zhou QM, Zhang MY, Jia WH, Yun JP, et al. Identification of  
574 a gene-expression signature for predicting lymph node metastasis in patients with  
575 early stage cervical carcinoma. Cancer. 2011;117:3363–73.
- 576 25. An JS, Huang MN, Song YM, Li N, Wu LY, Zhan QM. A preliminary study of  
577 genes related to concomitant chemoradiotherapy resistance in advanced uterine  
578 cervical squamous cell carcinoma. Chinese Medical Journal. 2013;126:4109–15.
- 579 26. Wang H, Wang M sen, Zhou YH, Shi JP, Wang WJ. Prognostic values of LDH  
580 and CRP in cervical cancer. OncoTargets and Therapy. 2020;13:1255–63.
- 581 27. Wang WJ, Li Y, Zhu J, Gao MJ, Shi JP, Huang YQ. Prognostic Values of  
582 Systemic Inflammation Response (SIR) Parameters in Resectable Cervical Cancer.  
583 Dose-Response. 2019;17.
- 584 28. Li J, Wu MF, Lu HW, Chen Q, Lin ZQ, Wang LJ. Pretreatment serum lactate  
585 dehydrogenase is an independent prognostic factor for patients receiving  
586 neoadjuvant chemotherapy for locally advanced cervical cancer. Cancer Medicine.  
587 2016;5:1863–72.
- 588 29. Kunkel M, Reichert TE, Benz P, Lehr HA, Jeong JH, Wieand S, et al.  
589 Overexpression of Glut-1 and increased glucose metabolism in tumors are  
590 associated with a poor prognosis in patients with oral squamous cell carcinoma.  
591 Cancer. 2003;97:1015–24.

- 592 30. Gambhir SS. Molecular imaging of cancer with positron emission tomography.  
593 Nature Reviews Cancer. 2002;2:683–93.
- 594 31. Li W, Tanikawa T, Kryczek I, Xia H, Li G, Wu K, et al. Aerobic Glycolysis Controls  
595 Myeloid-Derived Suppressor Cells and Tumor Immunity via a Specific CEBPB  
596 Isoform in Triple-Negative Breast Cancer. Cell Metabolism. 2018;28:87-103.e6.
- 597 32. Zhang R, Su J, Xue S-L, Yang H, Ju L-L, Ji Y, et al. HPV E6/p53 mediated down-  
598 regulation of miR-34a inhibits Warburg effect through targeting LDHA in cervical  
599 cancer. 2016.
- 600 33. Jafary F, Ganjalikhany MR, Moradi A, Hemati M, Jafari S. Novel Peptide  
601 Inhibitors for Lactate Dehydrogenase A (LDHA): A Survey to Inhibit LDHA Activity via  
602 Disruption of Protein-Protein Interaction. Scientific Reports. 2019;9.
- 603 34. Valvona CJ, Fillmore HL, Nunn PB, Pilkington GJ. The Regulation and Function  
604 of Lactate Dehydrogenase A: Therapeutic Potential in Brain Tumor. Brain Pathology.  
605 2016;26:3–17.
- 606 35. Moreno-Sánchez R, Marín-Hernández A, Gallardo-Pérez JC, Quezada H,  
607 Encalada R, Rodríguez-Enríquez S, et al. Phosphofructokinase type 1 kinetics,  
608 isoform expression, and gene polymorphisms in cancer cells. Journal of Cellular  
609 Biochemistry. 2012;113:1692–703.
- 610 36. Cardim Pires TR, Albanese JM, Schwab M, Marette A, Carvalho RS, Sola-Penna  
611 M, et al. Phosphofructokinase-P Modulates P44/42 MAPK Levels in HeLa Cells.  
612 Journal of Cellular Biochemistry. 2017;118:1216–26.
- 613 37. Shen J, Jin Z, Lv H, Jin K, Jonas K, Zhu C, et al. PFKP is highly expressed in  
614 lung cancer and regulates glucose metabolism. Cellular Oncology. 2020;43:617–29.



38. Umar SM, Kashyap A, Kahol S, Mathur SR, Gogia A, Deo SVS, et al. Prognostic and therapeutic relevance of phosphofructokinase platelet-type (PFKP) in breast cancer. *Experimental Cell Research*. 2020;396.

39. Qing Y, Dong L, Gao L, Li C, Li Y, Han L, et al. R-2-hydroxyglutarate attenuates aerobic glycolysis in leukemia by targeting the FTO/m6A/PFKP/LDHB axis. *Molecular Cell*. 2021;81:922-939.e9.

## Figure legends

### Figure 1. Unsupervised hierarchical cluster analysis of 14 glycolytic genes in

CC. The segregation of HCE (n=17), HG-CINs (n=10) and CC (n=76) is shown according to the expression profile of 14 glycolytic genes. Four groups were distinguished: the first group with downregulation of the genes (Group 1), the second and third groups (Groups 2A and 2B) with intermediate expression levels, and the fourth group with an upregulation profile (Group 3). Each column represents a sample, and each line represents a glycolytic gene. The number at the end of the CC sample name (1 to 4) indicates the FIGO I, II, III, and IV stages of the patient. The length and subdivision of the arms represent the relationship between the samples based on the intensity of gene expression: red for upregulation, blue for downregulation, and white for no change in expression. The analysis was performed with the expression values expressed in logarithmic form (base 2).

### Figure 2. Validation of LDHA and PFKP expression in CC. The expression of

LDHA and PFKP in CC was validated at the mRNA and protein levels by qRT-PCR and WB, respectively. Panel A shows the qRT-PCR analysis of LDHA and PFKP mRNA in 58 CCs. The expression was normalized with respect to the internal control (RPS13) and the control group by the double delta method using the final formula ( $2^{-\Delta\Delta CT}$ ). Panels B and C show representative images of WB of LDHA and PFKP expression, respectively: surviving patients, nonsurviving patients, no recurrence patients and recurrence patients. The molecular weight of the proteins is shown in kilodaltons (kDa). The protein  $\beta$ -actin was used as an internal control. Panel D show the mean expression  $\pm$  SD of LDHA and PFKP proteins between patients with CC who survived (white bars, n=47) vs. those who died (gray bars, n=22). The intensity of LDHA and PFKP was normalized with respect to  $\beta$ -actin. The expression is shown as optical density (OD) units. The significant differences between the groups were

calculated with the Mann–Whitney U test, and  $p < 0.05$  was considered statistically significant. Panel E shows the hazard ratio (HR) analysis in relation to LDHA and PFKP protein expression in CC. The risk of dying from CC increases exponentially as protein expression (OD) increases, but it is more evident with the expression of LDHA (dark blue circles represent nonsurviving patients, while light blue circles represent surviving patients) than PFKP (dark red circles represent nonsurviving patients, while light red circles represent surviving patients). SD= standard deviation.

**Figure 3. Expression of LDHA and PFKP proteins by IH.** The expression of the LDHA and PFKP proteins was determined by immunohistochemistry (IH) and compared between patients who survived without the disease (No recurrence) and patients who died and/or remained with the disease (Recurrence). Histological analysis included 12 controls, 18 CC and 6 metastatic tissues. Panels A-E show the detection of the LDHA protein, and panels F-J show the detection of the PFKP protein with a specific antibody. A representative image of the experiments is shown. The specific signal for proteins is shown in brown color and counterstained with hematoxylin in violet color. Original amplification 400x; the bars measure 20  $\mu$ m. Panels K show the quantitative analysis of LDHA and PFKP expression in CC tissues of patients No recurrence vs recurrence determined by IH. The average optical density and staining area of LDHA and PFKP (DOI) in the tissues were considered. The mean  $\pm$  SD of three independent experiments is shown. Mann–Whitney test was performed to assess the difference between the groups, and  $p < 0.05$  was considered statistically significant. SD= standard deviation.

**Figure 4. Kaplan–Meier survival curves of LDHA and PFKP.** OS analysis and according to the expression of LDHA and PFKP by qRT–PCR (panels A-C) and WB (panels D-F). DFS analysis according to the expression of LDHA and PFKP by qRT–PCR (panels G-I) and WB (panels J-L). The cutoff values were calculated using ROC

curves. In the overall survival analysis, the red lines include the values of nonsurviving patients, while the blue line includes the values of surviving patients. In the disease-free survival analysis, the red lines contain the values of nonsurviving patients and surviving patients with the disease, while the blue lines include the values of surviving cured patients. Censored patients are shown marked with vertical bars. The p value was calculated with the log-rank test.

**Supplementary Figure 1. Analysis workflow of 188 cervical cancer cases.** Figure shows the analysis workflow of the 188 CC cases explored in this study. The expression of 14 genes involved in glycolysis were investigated in 76 CC with HG-1.0ST microarray and 9 genes were explored in 42 CC with HG-Focus, with 21 CCs in common. Five-year survival was investigated in 61 of 76 patients with CC explored with HG 1.0 ST and 36 of 42 patients investigated with HG-Focus. The expression of the LDHA and PFKP was validated by qRT-PCR, WB and IH. All patients explored by qRT-PCR (n=58) and 59 of 69 patients studied by WB were included in the follow-up studies, with 15 CCs in common. The protein expression of LDHA and PFKP was determined in 18 CC tissues by IH.

**Supplementary Figure 2. Expression of glycolytic genes in CC. Box plots of the expression of 14 genes of the glycolytic pathway obtained with the HG-1.0ST microarray.** The analysis was performed on 17 controls, 10 HG-CIN patients and 76 CC patients. The graphs show the value of the normalized fluorescence intensity (log 2) for each gene. The upper and lower limits of the boxes represent the 75<sup>th</sup> and 25<sup>th</sup> percentiles, respectively. The mean is shown as the center black line inside the boxes, and the median is shown as "+". The whiskers represent the maximum and minimum values that lie within 1.5 times the interquartile range from the ends of the frame. Values outside this range are displayed as black dots. The *Mann-Whitney U*

test was used to determine the significant differences between the groups,  $**p < 0.05$ ,  $***p < 0.005$ .

**Supplementary Figure 3. Box plots of the expression of 9 genes of the glycolytic pathway obtained with the HG-Focus microarray.** The analysis was performed on 12 controls and 76 CC16+ patients. The graphs show the value of the normalized fluorescence intensity (log 2) for each gene. The upper and lower limits of the boxes represent the 75<sup>th</sup> and 25<sup>th</sup> percentiles, respectively. The mean is shown as the center black line inside the boxes, and the median is shown as "+". The whiskers represent the maximum and minimum values that lie within 1.5 times the interquartile range from the ends of the frame. Values outside this range are displayed as black dots. The *Mann–Whitney U test* was used to determine the significant differences between the groups,  $**p < 0.05$ ,  $***p < 0.005$ .

**Supplementary Figure 4. Unsupervised hierarchical cluster analysis of 9 glycolytic genes in CC.** The segregation of 12 controls and 42 CC HPV16+ is shown according to the expression profile of 9 glycolytic genes explored with the HG-Focus microarray, and 4 groups were distinguished: a first group with downregulation of the genes (Group 1), the second and third groups (Groups 2A and 2B) with intermediate expression levels and the fourth group with an upregulation profile (Group 3). Each column represents a sample, and each line represents a glycolytic gene. The number at the end of the CC sample name (1 to 4) indicates the FIGO I, II, III, and IV stages of the patient. The length and subdivision of the arms represent the relationship between the samples based on the intensity of gene expression: red for upregulation, blue for downregulation, and white for no change in expression. The analysis shows gene expression in log 2.

**Supplementary Figure 5.** Kaplan–Meier survival curves of HG-1.0 ST microarray.

The OS (A–I panels) and DFS (J–O panels) of patients with CC were analyzed according to the expression of the 14 glycolytic genes obtained with the HG-1.0ST microarray using the Kaplan–Meier method with the SPSS program. The cutoff values of the expression of each gene that best separated the women were calculated using ROC curves. In the overall survival analysis, the red lines include the values of nonsurviving patients, while the blue line includes the values of surviving patients. In the disease-free survival analysis, the red lines contain the values of nonsurviving patients and surviving patients with the disease, while the blue lines include the surviving cured patients. The mean follow-up time of patients 60 months after the initial diagnosis. Censored patients are shown marked with vertical bars. The *p value* was calculated with the log-rank test.

**Supplementary Figure 6. Kaplan–Meier survival curves.** The OS (A–J panels) and DFS (K panel) of patients with CC were analyzed according to the expression of the 9 glycolytic genes obtained with the HG-Focus microarray using the Kaplan–Meier method. The cutoff values of the expression of each gene that best separated the patients were calculated using ROC curves. In the overall survival analysis, the red lines include the values of nonsurviving patients, while the blue line includes the values of surviving patients. In the disease-free survival analysis, the red lines contain the values of nonsurviving patients and surviving patients with the disease, while the blue lines include the values of surviving cured patients. Censored patients are shown marked with vertical bars. The *p value* was calculated with the log-rank test.

**Table 1.** Univariate and multivariate analyses for the overall survival of patients with CC with Cox proportional hazards models including the expression of glycolytic genes explored with HG 1.0 ST microarray and FIGO clinical stage.

| Covariates       | n  | Univariate analysis <sup>e</sup> |          |                      | Multivariate analysis <sup>f</sup> |                      |                       |
|------------------|----|----------------------------------|----------|----------------------|------------------------------------|----------------------|-----------------------|
|                  |    | HR <sup>b</sup>                  | 95% CI   | p <sup>c</sup>       | HR <sup>b</sup>                    | 95% CI               | p <sup>c</sup>        |
| <b>FIGO</b>      |    |                                  |          |                      |                                    |                      |                       |
| ≤IIA             | 29 | 1                                |          |                      | 1.0                                |                      |                       |
| ≥IIB             | 32 | 3.4                              | 1.1-10.4 | $3.6 \times 10^{-2}$ | 3.3 <sup>d</sup>                   | 1.1-9.6 <sup>d</sup> | $3.5 \times 10^{-2d}$ |
| <b>LDHA</b>      |    |                                  |          |                      |                                    |                      |                       |
| Low <sup>a</sup> | 40 | 1.0                              |          |                      | 1.0                                |                      |                       |
| High             | 21 | 3.1                              | 1.1-8.3  | $2.7 \times 10^{-2}$ | 3.0                                | 1.1-8.19             | $2.9 \times 10^{-2}$  |
| <b>PFKP</b>      |    |                                  |          |                      |                                    |                      |                       |
| Low              | 32 | 1.0                              |          |                      | 1.0                                |                      |                       |
| High             | 29 | 3.5                              | 1.1-10.9 | $3.0 \times 10^{-2}$ | 3.4                                | 1.1-10.5             | $3.5 \times 10^{-2}$  |
| <b>TPI1P1</b>    |    |                                  |          |                      |                                    |                      |                       |
| Low              | 52 | 1.0                              |          |                      | 1.0                                |                      |                       |
| High             | 9  | 3.7                              | 1.3-10.9 | $1.5 \times 10^{-3}$ | 2.6                                | 0.8-7.87             | $4.0 \times 10^{-2}$  |
| <b>GAPDH</b>     |    |                                  |          |                      |                                    |                      |                       |
| Low              | 54 | 1.0                              |          |                      | 1.0                                |                      |                       |
| High             | 7  | 5.6                              | 1.9-16.3 | $2.0 \times 10^{-3}$ | 4.0                                | 1.3-12.3             | $5.2 \times 10^{-2}$  |
| <b>GPI</b>       |    |                                  |          |                      |                                    |                      |                       |
| Low              | 19 | 1.0                              |          |                      | 1.0                                |                      |                       |
| High             | 42 | 8.5                              | 1.1-64.1 | $3.9 \times 10^{-2}$ | 7.9                                | 1.0-60.0             | $5.6 \times 10^{-2}$  |
| <b>ENO</b>       |    |                                  |          |                      |                                    |                      |                       |
| Low              | 21 | 1.0                              |          |                      | 1.0                                |                      |                       |
| High             | 40 | 9.2                              | 1.2-69.5 | $3.2 \times 10^{-2}$ | 7.3                                | 0.9-56.4             | $5.6 \times 10^{-2}$  |
| <b>PGK1</b>      |    |                                  |          |                      |                                    |                      |                       |
| Low              | 44 | 1.0                              |          |                      | 1.0                                |                      |                       |
| High             | 17 | 2.8                              | 1.0-7.6  | $3.7 \times 10^{-2}$ | 2.3                                | 0.9-6.2              | $1.1 \times 10^{-1}$  |
| <b>ALDOA</b>     |    |                                  |          |                      |                                    |                      |                       |
| Low              | 15 | 1.0                              |          |                      | 1.0                                |                      |                       |
| High             | 46 | 5.8                              | 0.7-44.3 | $8.7 \times 10^{-2}$ | 4.9                                | 0.6-37.6             | $1.2 \times 10^{-1}$  |

CI= confidence interval; HR= hazard ratio; FIGO stage=International Federation of Gynecology and Obstetrics stage.

a. Optimal cutoff values were selected according to the ROC analysis in relation to fold changes in genes expression obtained with the Human Gene 1.0 ST microarray.

b. Adjusted hazard ratio.

c. Cox proportional hazards model.

d. These calculations were obtained in the multivariate analysis performed with LDHA. The values of FIGO obtained in the multivariate analysis with the other markers are not shown but are similar to these values.

e. Univariate analysis was performed considering one variable for the analysis.

f. Multivariate analysis was performed considering gene expression and FIGO stage for the analysis.

**Table 2.** Hazard ratio analyses of patients with CC with Cox proportional hazards models including the expression of the glycolytic proteins LDHA and PFKP and FIGO clinical stage

| Covariates             | n  | Univariate analysis <sup>e</sup> |           |                        | Multivariate analysis <sup>f</sup> |          |                        |
|------------------------|----|----------------------------------|-----------|------------------------|------------------------------------|----------|------------------------|
|                        |    | HR <sup>c</sup>                  | 95% CI    | p <sup>d</sup>         | HR <sup>c</sup>                    | 95% CI   | p <sup>d</sup>         |
| Overall Survival       |    |                                  |           |                        |                                    |          |                        |
| LDHA                   |    |                                  |           |                        |                                    |          |                        |
| FIGO ≤IIA <sup>a</sup> | 27 | 1                                |           |                        | 1                                  |          |                        |
| FIGO ≥IIB              | 32 | 7.0                              | 1.6-31.3  | 1.0 X 10 <sup>-2</sup> | 5.5                                | 1.2-25.2 | 2.7 x 10 <sup>-2</sup> |
| Low <sup>b</sup>       | 43 | 1                                |           |                        | 1                                  |          |                        |
| High                   | 16 | 4                                | 1.4-11.1  | 8.0 X 10 <sup>-3</sup> | 2.8                                | 1.0-7.9  | 5.2 x 10 <sup>-2</sup> |
| PFKP                   |    |                                  |           |                        |                                    |          |                        |
| FIGO ≤IIA <sup>a</sup> | 27 | 1                                |           |                        | 1                                  |          |                        |
| FIGO ≥IIB              | 32 | 7.0                              | 1.6-31.3  | 1.0 X 10 <sup>-2</sup> | 6.9                                | 1.5-30.5 | 1.1 x 10 <sup>-2</sup> |
| Low <sup>b</sup>       | 33 | 1                                |           |                        | 1                                  |          |                        |
| High                   | 26 | 3.3                              | 1.1-10.55 | 4.0 X 10 <sup>-2</sup> | 3.2                                | 1.0-10.2 | 4.6 x 10 <sup>-2</sup> |
| LDHA/PFKP <sup>g</sup> |    |                                  |           |                        |                                    |          |                        |
| FIGO ≤IIA <sup>a</sup> | 27 | 1                                |           |                        | 1                                  |          |                        |
| FIGO ≥IIB              | 32 | 7.0                              | 1.6-31.3  | 1.0 X 10 <sup>-2</sup> | 6.1                                | 1.3-31.2 | 1.8 x 10 <sup>-2</sup> |
| Low <sup>b</sup>       | 23 | 1                                |           |                        | 1                                  |          |                        |
| One high               | 25 | 2.2                              | 0.65-7.6  | 2.0 x 10 <sup>-1</sup> | 5.3                                | 1.0-25.6 | 4.0 x 10 <sup>-2</sup> |
| Two high               | 11 | 8.1                              | 2.6-26.10 | 4.3 x 10 <sup>-4</sup> | 6.6                                | 1.3-32.1 | 2.5 x 10 <sup>-2</sup> |
| Disease-free survival  |    |                                  |           |                        |                                    |          |                        |
| LDHA                   |    |                                  |           |                        |                                    |          |                        |
| FIGO ≤IIA <sup>a</sup> | 27 | 1                                |           |                        | 1                                  |          |                        |
| FIGO ≥IIB              | 32 | 6.4                              | 1.9-21.7  | 3.0 X 10 <sup>-3</sup> | 4.6                                | 1.3-16.2 | 1.7 x 10 <sup>-2</sup> |
| Low <sup>b</sup>       | 43 | 1                                |           |                        | 1                                  |          |                        |
| High                   | 16 | 4.5                              | 1.9-10.8  | 1.0 X 10 <sup>-3</sup> | 3.2                                | 1.3-7.6  | 1.2 x 10 <sup>-2</sup> |
| PFKP                   |    |                                  |           |                        |                                    |          |                        |
| FIGO ≤IIA <sup>a</sup> | 27 | 1                                |           |                        | 1                                  |          |                        |
| FIGO ≥IIB              | 32 | 6.4                              | 1.9-21.7  | 3.0 X 10 <sup>-3</sup> | 6.1                                | 1.7-20.6 | 4.0 x 10 <sup>-2</sup> |
| Low <sup>b</sup>       | 28 | 1                                |           |                        | 1                                  |          |                        |
| High                   | 31 | 3.2                              | 1.2-8.2   | 1.8 X 10 <sup>-2</sup> | 2.9                                | 1.1-7.5  | 2.8 x 10 <sup>-2</sup> |
| LDHA/PFKP <sup>g</sup> |    |                                  |           |                        |                                    |          |                        |
| FIGO ≤IIA <sup>a</sup> | 27 | 1                                |           |                        | 1                                  |          |                        |
| FIGO ≥IIB              | 32 | 6.4                              | 1.9-21.7  | 3.0 X 10 <sup>-3</sup> | 4.8                                | 1.3-17.9 | 1.8 x 10 <sup>-2</sup> |
| Low <sup>b</sup>       | 23 | 1                                |           |                        | 1                                  |          |                        |
| One high               | 25 | 2.2                              | 0.7-7.6   | 2.0 x 10 <sup>-1</sup> | 2.7                                | 0.8-9.5  | 1.1 x 10 <sup>-1</sup> |
| Two high               | 11 | 8.1                              | 2.5-26.1  | 4.3 x 10 <sup>-4</sup> | 5.1                                | 1.5-16.6 | 7.0 x 10 <sup>-3</sup> |

a. FIGO stage analysis

b. Optimal cutoff values were selected according to the ROC analysis in relation to the expression of LDHA or PFKP obtained with WB.

c. Adjusted hazard ratio.

d. Cox proportional hazards model.

e. Univariate analysis was performed considering one variable for the analysis.

f. Multivariate analysis was performed considering gene expression and FIGO stage for the analysis.

g. Low= downregulation of two genes; One high= upregulation of one gene; Two high= upregulation of LDHA and PFKP.

CI= confidence interval; HR = hazard ratio; FIGO stage= International Federation of Gynecology and Obstetrics stage



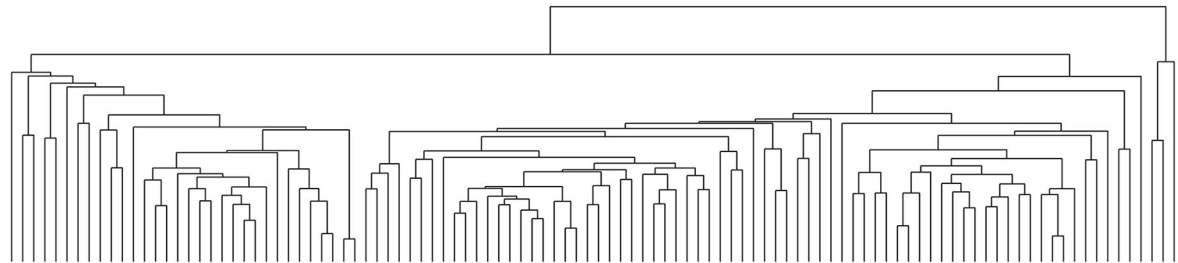

CC253-2  
CIN006  
HCE033  
CC456-2  
CC466-1  
CC102-1  
CC124-1  
CC075-1  
CC271-2  
CC323-3  
CC469-4  
CIN002  
HCE041  
HCE010  
HCE007  
CC221-1  
HCE036  
CIN012  
HCE038  
CC478-1  
HCE039  
CIN377  
HCE019  
CC087-1  
CC330-1  
CC288-2  
HCE024  
CC339-1  
HCE013  
HCE011  
HCE012  
HCE021  
CIN350  
CC318-3  
CC163-1  
CC230-1  
CC244-2  
CC322-3  
CC265-1  
HCE043  
CC116-1  
HCE005  
HCE020  
CC437-2  
CC121-1  
HCE045  
CC457-3  
CIN042  
CIN334  
CIN016  
CIN015  
CIN018  
CC495-2  
CC412-1  
CC426-2  
CC486-1  
CC189-1  
CC248-1  
CC298-3  
CC156-3  
CC154-3  
CC157-4  
CC386-1  
CC336-1  
CC081-1  
CC274-1  
CC462-4  
CC369-1  
CC468-1  
CC326-2  
CC444-2  
CC256-2  
CC345-2  
CC476-1  
CC307-2  
CC483-4  
CC494-3  
CC365-3  
CIN194-2  
CC158-4  
CC409-1  
CC455-2  
CC260-2  
CC072-1  
CC378-1  
CC411-3  
CC240-3  
CC315-3  
CC390-1  
CC489-3  
CC208-1  
CC392-3  
CC425-1  
CC282-3  
CC368-3  
CC496-3  
CIN198-3  
CC458-2  
CC487-2  
CIN048  
CC035-1  
CC380-3  
CC326-2  
SiHa  
HeLa

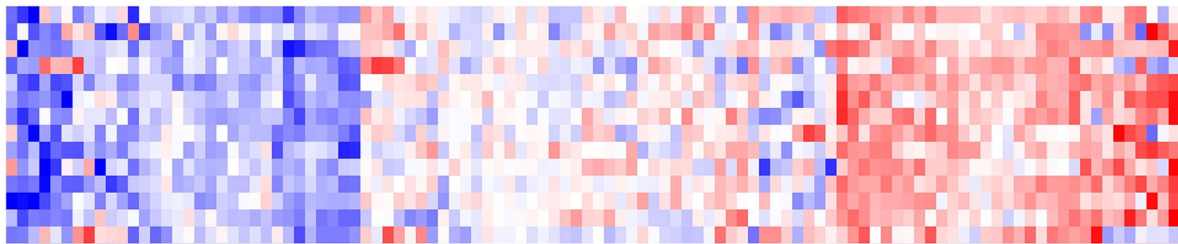

SLC2A1  
ADPGK  
ALDOA  
EDARADD  
ENO1  
GAPDH  
GPI  
HK2  
LDHA  
PFKP  
PGK1  
PKM  
TPI1P1  
SLC9A1

Group 1

Group 2A

Group 2B

Group 3

**A**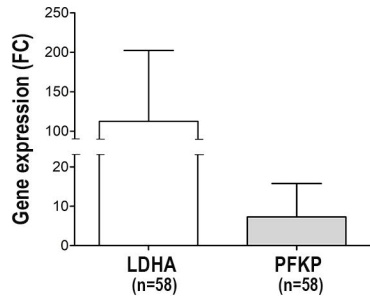**B**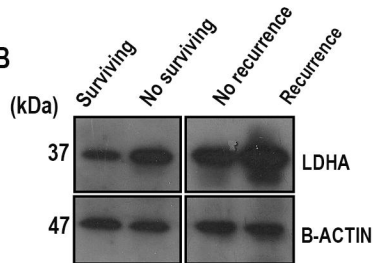**C**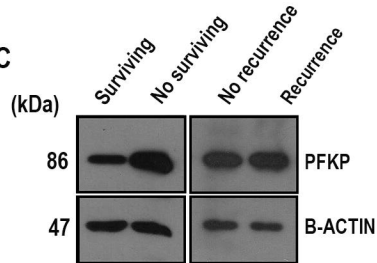**D**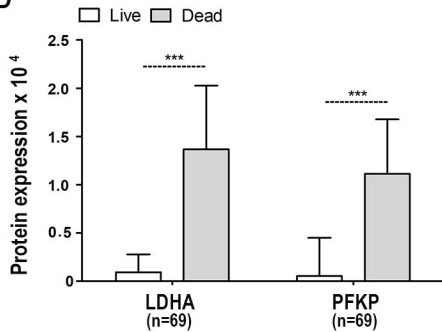**E**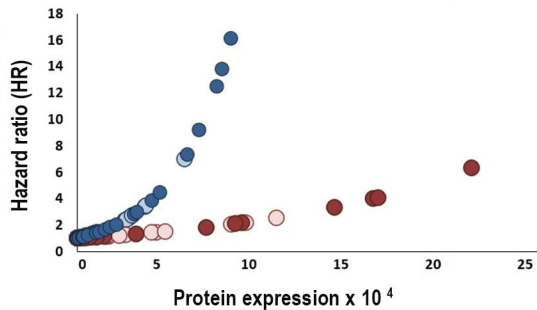

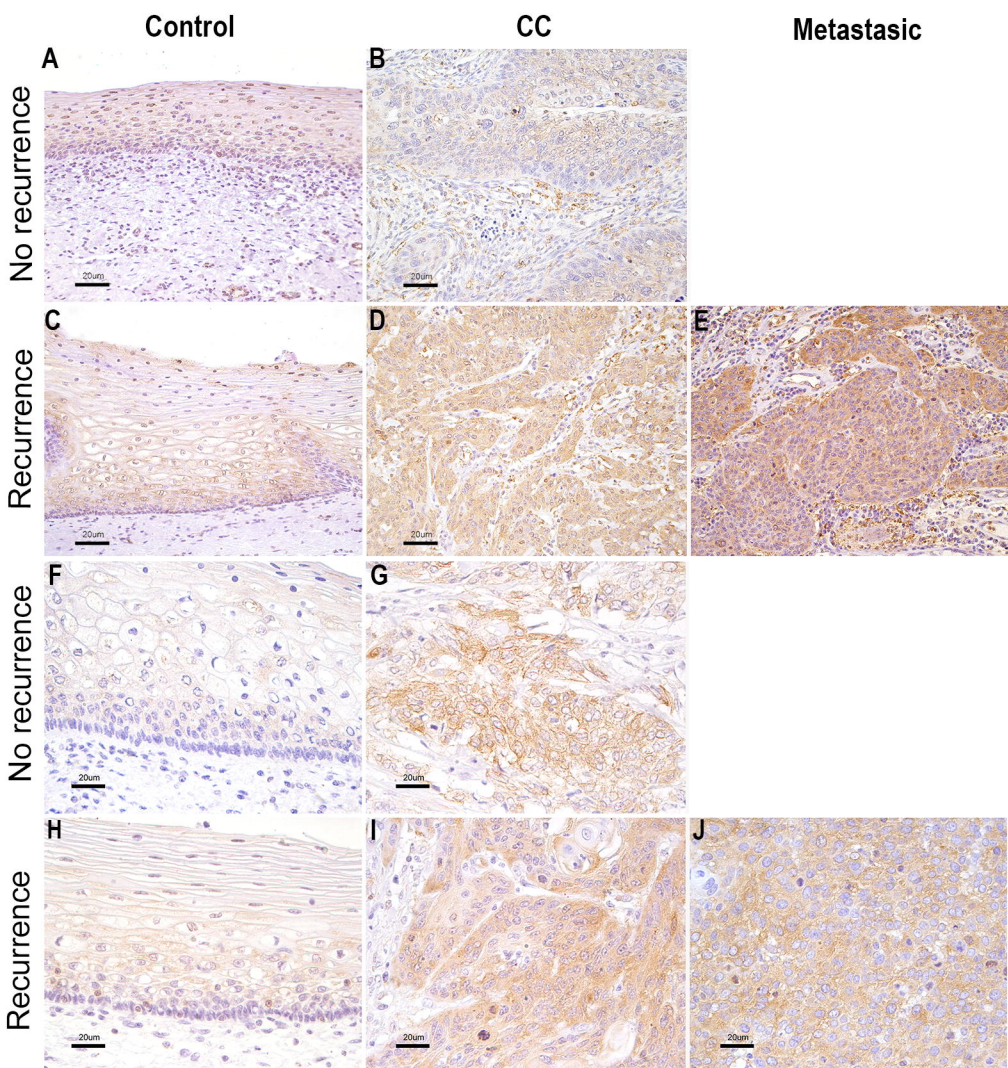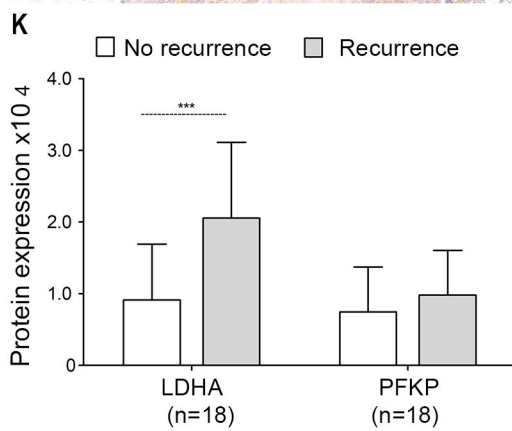

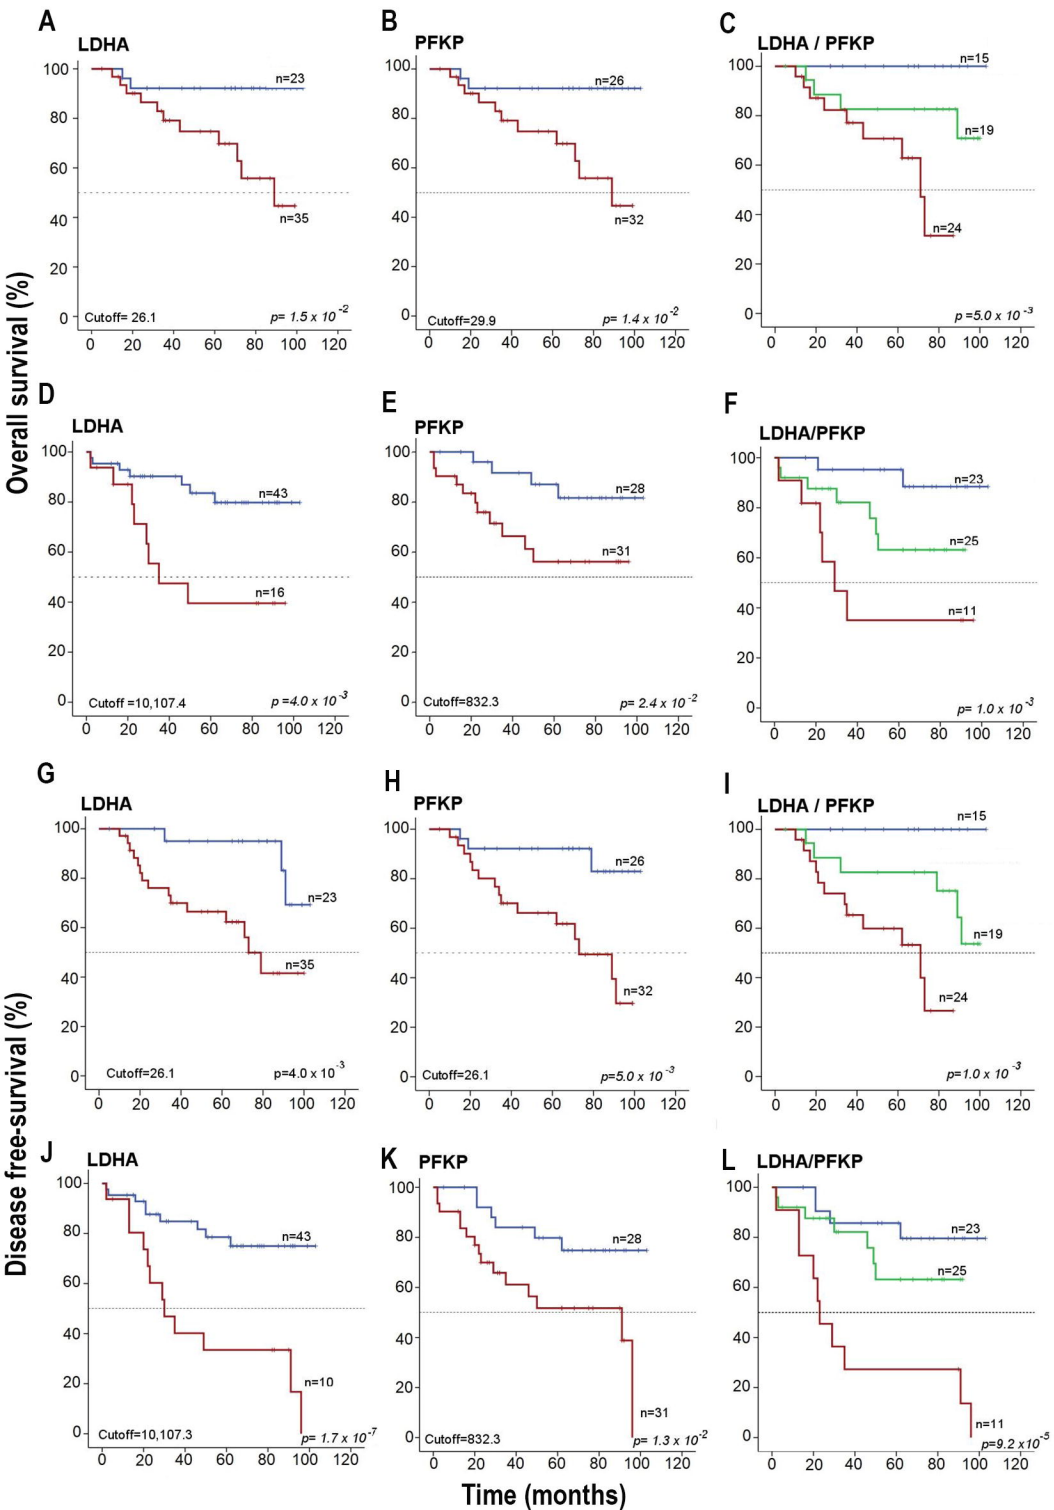

Source: http://medrxiv.stage.highwire.org/content/10.1101/2022.08.02.22277946v1.full.pdf
