1       **Gene expression levels of the glycolytic enzymes lactate dehydrogenase A**  
2       **(LDHA) and phosphofructokinase platelet (PFKP) are good predictors of**  
3       **survival time, recurrence and risk of death in cervical cancer.**

4  
5 Verónica Bolaños-Suárez<sup>1</sup>, Ana Alfaro<sup>2</sup>, Ana María Espinosa<sup>3</sup>, Ingrid Medina-  
6 Martínez<sup>4</sup>, Eligia Juárez<sup>5</sup>, Nicolás Villegas-Sepúlveda<sup>6</sup>, Marco Gudiño-Zayas<sup>1</sup>,  
7 América Gutiérrez-Castro<sup>5</sup>, Edgar Román-Bassaure<sup>7</sup>, María Eugenia Salinas-  
8 Nieves<sup>8</sup>, Sergio Bruno-Muñoz<sup>8</sup>, Oscar Flores-Herrera<sup>9</sup>, Jaime Berumen<sup>1\*</sup>.

9  
10       1.Unidad de Investigación en Medicina Experimental, Facultad de Medicina,  
11       Universidad Nacional Autónoma de México, Mexico City, Mexico

12       2.Anatomía Patológica. Hospital General de México, Dr. Eduardo Liceaga,  
13       Mexico City, México.

14       3.Farmacología Clínica, Hospital General de México, Dr. Eduardo Liceaga,  
15       Mexico City, México.

16       4.Departamento de Bioquímica y Biología Molecular, Facultad de Medicina,  
17       Universidad Nacional Autónoma de México, Mexico City, México.

18       5.Unidad de Medicina Genómica, Hospital General de México. Dr. Eduardo  
19       Liceaga Mexico City, México.

20       6.Departamento de Biomedicina Molecular, Centro de Investigación y Estudios  
21       Avanzados del Instituto Politécnico Nacional, Mexico City, México.

22       7.Servicio de Oncología, Hospital General de México, Dr. Eduardo Liceaga,  
23       Mexico City, México.

24       8.Servicio de Ginecología, Clínica de Colposcopia, Hospital General de  
25       México, Dr. Eduardo Liceaga, Mexico City, México.

26       9.Departamento de Bioquímica, Facultad de Medicina, Universidad Nacional  
27       Autónoma de México, Mexico City, México.

28  
29       **\*Corresponding author:** Unidad de Investigación en Medicina Experimental,  
30       Facultad de Medicina, UNAM, Hospital General de México Dr. Eduardo Liceaga,  
31       06720, Mexico City, Mexico, phone: +52 551850-4023.

32                       **e-mail:** *jaimeberumen47@gmail.com*.

33  
34  
35       **Keywords:** *Lactate dehydrogenase A (LDHA), phosphofructokinase platelet (PFKP),*  
36       *cervical cancer, survival, risk of death.*

## Abstract

37  
38  
39  
40  
41  
42  
43  
44  
45  
46  
47  
48  
49  
50  
51  
52  
53  
54  
55  
56  
57  
58  
59  
60  
61  
62  
63

Background. Up to 74% of patients with cervical cancer (CC) may experience recurrence after their treatment, and most of them are identified late when only the clinical parameters are used, which decreases their chances of recovery. Molecular markers can improve the prediction of clinical outcome and identify therapeutic targets in CC. Glycolysis is altered in 70% of CCs, so it could be a metabolic pathway in which molecular markers associated with the aggressiveness of CC can be identified.

Methods. The expression of 14 glycolytic genes was analyzed in 118 CC samples by microarrays, and only LDHA and PFKP were validated by qRT-PCR (n=58) and in second and third replicates by Western blotting (n=69) and immunohistochemistry (n=18).

Results. LDHA and PFKP were associated with poor overall survival [OS: LDHA HR=3.0 (95% CI= 1.1-8.2);  $p=2.9 \times 10^{-2}$ ; PFKP HR=3.4 (95% CI= 1.1-10.5);  $p=3.5 \times 10^{-2}$ ] and disease-free survival [DFS: LDHA HR=2.7 (95% CI= 1.6-6.3);  $p=2.6 \times 10^{-2}$ ] independent of FIGO clinical stage. The risk of death was greater when both biomarkers were overexpressed than when using only FIGO stage [HR =7 (95% CI 1.6-31.1,  $p=1.0 \times 10^{-2}$ ) versus HR=8.1 (95% CI=2.6-26.1;  $p=4.3 \times 10^{-4}$ )] and increased exponentially as the expression of LDHA and PFKP increased.

Conclusions. LDHA and PFKP at the mRNA and protein levels were associated with poor overall survival, disease-free survival and increased risk of death of patients with CC regardless of FIGO stage. The measurement of expression of these two markers could be very useful to evaluate the clinical evolution and the risk of death from CC and to make better therapeutic decisions at the beginning of treatment.

## 65 **1. Background**

66 Cervical cancer (CC) is the fourth most common cancer in women worldwide [1]  
67 Persistent infection with human papillomavirus (HPV), particularly high-risk oncogenic  
68 viruses, is the main etiological agent for the development of CC. Despite early  
69 detection programs and vaccinations against the most oncogenic HPVs [2], it is  
70 estimated that 569,000 new cases occur each year and cause 311,365 deaths  
71 worldwide [1], indicating that CC continues to be a major health problem, mainly in  
72 developing countries where most cases occur.

73 Treatment of CC includes surgery, radiotherapy and chemotherapy, which depend on  
74 the clinical stage of the disease [3]. However, it is estimated that a significant  
75 percentage of patients have pelvic recurrence (10-23% in stage IB-IIB and 42-74% in  
76 stage III-IVA) or metastases (16-26% in stage IB-IIB and 39-75% in stage III-IVA)  
77 after treatment, and when this occurs, the patients often have poor survival [4] , [5]. In  
78 addition, only 32% of patients with recurrent disease are identified early (before 6  
79 months) during medical follow-up, which decreases the chance of recovery and the  
80 survival time [6]. Although the clinical International Federation of Gynecology and  
81 Obstetrics (FIGO) stage, the clinical characteristics of the tumor, metastasis to lymph  
82 nodes and parametrial invasion are predictors of recurrence and survival time, there  
83 are no molecular markers approved for clinical use that predict the clinical evolution  
84 of patients with CC. Molecular markers alone or in conjunction with clinical data  
85 improve the prediction of the clinical outcome and facilitate better therapeutic  
86 decision-making, as has been demonstrated in colorectal [7] and breast [8] cancers.

87 Since glycolysis is increased in 70% of human cancers, with lactate production even  
88 in the presence of oxygen (Warburg effect) [9][10], it can be used to identify new

89 prognostic biomarkers in CC. In fact, the usefulness of several genes or proteins  
90 involved in glycolysis has been investigated to evaluate survival and aggressiveness  
91 in CC, such as glucose transporter 1 (GLUT1) [11], hexokinase 2 (HK2) [12],  
92 phosphofructokinase isoform M (PFKM) (as part of a genetic profile)[13] and total  
93 lesion glycolysis (TLG), a parameter measurable through positron emission  
94 tomography (PET) [14]. However, the predictive efficacy of these biomarkers either  
95 has not been reported or has been reported to be intermediate. Perhaps PET is the  
96 most efficient method; however, it is very expensive. On the other hand, it would be  
97 desirable to identify molecular therapeutic targets in CC since the antitumor strategy  
98 with specific target drugs is showing great benefit in many tumor types with a marked  
99 decrease in side effects [15].

100 In a previous study, our group found a glycolytic gene profile in CC associated with a  
101 decrease in survival [16]. In this paper, we investigate which genes of that glycolytic  
102 expression profile are most highly associated with survival and tumor aggression in  
103 CC. Of the genes finally identified, the mRNA and protein levels of lactate  
104 dehydrogenase A (LDHA) and phosphofructokinase platelet (PFKP) were explored in  
105 a main discovery sample of 118 CCs, and they were validated in two additional  
106 replicates (n = 58 and 69 CCs) and in 18 CC tissues preserved in paraffin. These two  
107 markers allow to evaluate of the clinical evolution and mortality of patients with CC  
108 regardless of the FIGO stage.

## 109 **2. Materials**

### 110 **Ethical consent**

111 The study protocol was approved by the Scientific and Ethics Committee of the  
112 General Hospital of Mexico (HGM) (approval number DIC/03/311/04/051). This study,  
113 all experiments and analyses were performed in accordance with the Declaration of

114 Helsinki [17]. Written informed consent was obtained from all participants before their  
115 inclusion in the study.

### 116 **Patient selection and clinical characteristics**

117 The study included 188 patients with CC (Supplementary Figure 1, Supplementary  
118 Table 1), 10 patients with high-grade epithelial lesions (HG-CINs) and 36 women with  
119 healthy cervical epithelium (HCE) evaluated in the Departments of Oncology and  
120 Gynecology and Obstetrics of the HGM. Patients with CC were selected from a  
121 previous study that included 462 patients recruited from November 2003 to April  
122 2005 and from January 2006 to July 2007 [18]. The inclusion criteria were as follows:  
123 patients diagnosed with invasive CC, without previous treatments. Only patients from  
124 whom high-quality RNA and tumor biopsies had more than 70% tumor cells were  
125 included in the present study. The exclusion criteria were insufficient quality of the  
126 biological sample. All patients received complete clinical evaluation and were treated  
127 with surgery, radiation, chemotherapy, or a combination of these according to  
128 American Cancer Society guidelines. Tumor staging was performed in accordance  
129 with the latest International Federation of Gynecology and Obstetrics (FIGO) protocol  
130 for gynecological cancer [19]. The average age of the patients was 51 years, with a  
131 range of 23 to 89 years. After their treatment, they were followed up and evaluated  
132 periodically at the HGM. HCE were obtained from patients who underwent  
133 hysterectomy for myomatosis with a normal cervix for cytology and colposcopy as  
134 described previously [18]. The tissues were frozen in liquid nitrogen and stored at -  
135 80°C.

### 136 **RNA isolation**

137 Total RNA from the samples was extracted with TRIzol™ reagent (Invitrogen,  
138 Carlsbad CA, USA) according to the manufacturer's instructions. RNA integrity was

139 verified by agarose gel electrophoresis, determining the presence of 18S and 28S  
140 ribosomal RNA.

141

#### 142 **Glycolytic gene expression and data analysis**

143 The glycolysis gene expression of 76 CC, 10 HG-CIN and 17 HCE tissues was  
144 examined using a Human Gene 1.0ST (HG-1.0ST) microarray and with the Human  
145 Gene Focus (HG-Focus) microarray in 42 CCs and 12 HCE (Affymetrix, Santa Clara,  
146 CA). Gene expression was obtained from two studies previously published by our  
147 working group in the Gene Expression Omnibus (GEO) database with accession  
148 numbers GSE52904 [16] and GSE39001 [18]. See supplementary text 1.

#### 149 **Quantitative PCR (qRT-PCR)**

150 cDNA was synthesized using the High-Capacity cDNA Transcription Kit (Applied  
151 Biosystems) using 5 µg of RNA according to the manufacturer's protocol. Gene  
152 expression of *LDHA*, *PFKP* and an internal control (*RPS13*) was measured in 58 CC  
153 and 19 HCE by qRT-PCR and TaqMan gene expression assays were used (*LDHA*,  
154 Hs00855332\_g1; *PFKP*, Hs00242993\_m1; *RPS13*, HS 01011487\_g1; Applied  
155 Biosystem Inc.). The experiments were run in triplicate in a final volume of 20 µL,  
156 including 200 ng of cDNA template using the TaqMan® Universal PCR Master Mix  
157 (4304437, Applied Biosystems), according to the manufacturer's instructions. The  
158 expression of the *LDHA* and *PFKP* genes was normalized in each tumor and control  
159 sample with *RPS13* using as previously reported [18]. The FC in expression was  
160 calculated by dividing the median normalized intensity of each tumor sample by the  
161 median normalized intensity of the whole control samples.

#### 162 **Western blot (WB)**

163 *LDHA* and *PFKP* protein expression was determined using WB in 69 CC samples.  
164 25 ng of protein was resolved on 8% SDS-PAGE and electrotransferred onto a

165 nitrocellulose membrane and incubated with a mouse monoclonal antibodies anti-  
166 human LDHA (H-10: sc-133123; 1:1,000) or PFKP (F-7: sc-514824; 1:200) and goat  
167  $\beta$ -actin antibody (I-19: sc-1616), (Santa Cruz Biotechnology, Inc.) overnight at 4°C.  
168 The membranes were then incubated with horseradish peroxidase (HRP)-conjugated  
169 secondary antibodies (anti-mouse IgG + IgM (H+L) antibodies; 1:10,00; Jackson  
170 ImmunoResearch Laboratories, Inc.) and anti-goat IgG-HRP (sc-2354; 1:1,000;  
171 Santa Cruz Biotechnology, Inc.) for 1 h at room temperature. Prestained Broad  
172 Range SDS-PAGE Standards (BIO-RAD, CA) were used for molecular weight  
173 estimation on gels.  $\beta$ -actin was used as an internal control. Loading buffer without  
174 sample was used as negative control. The immunoreactive proteins were developed  
175 using the SuperSignal™ Chemiluminescent HRP Kit (Thermo Fisher Scientific).  
176 Densitometric analysis was performed with ImageJ (NIH, Bethesda, MD). The optical  
177 density was calculated as  $OD = \log_{10}(255/\text{pixel value})$ .

### 178 **Immunohistochemistry (IH)**

179 The protein expression of LDHA and PFKP was determined in 18 CC, 12 HCE and 6  
180 metastatic samples by IH. Human paraffin-embedded tissue samples were collected  
181 at the Pathology Department of HGM from patients evaluated from January 2008 to  
182 March 2013. The inclusion criteria were women with CC at any FIGO stage whose  
183 diagnostic biopsy was taken prior to treatment, with complete clinical data available,  
184 and with follow-up data of at least 24 months after treatment. All patients received  
185 complete clinical evaluation according to the ACS guidelines. Clinicopathological  
186 information was collected from medical records. Tissue microarrays (TMAs) were  
187 built as previously described [18]. The TMA included kidney tumor tissue as a  
188 positive control, which was previously determined to present high LDHA and PFKP  
189 expression ([www.proteinatlas.org](http://www.proteinatlas.org)). IH was performed with the Ultra Streptavidin  
190 (USA) HRP Detection Kit (Multi-Species) (BioLegend, CA) according to the

191 manufacturer's instructions. The following mouse monoclonal antibodies were used:  
192 LDH (H-10) sc-133123 (1:200) and PFKP (F-7) sc-514824 (1:100) from Santa Cruz  
193 Biotechnology (Santa Cruz, CA). Antigen-antibody complexes were detected using  
194 the avidin-biotin peroxidase method, with 3,3'-diaminobenzidine-tetrahydrochloride as  
195 a chromogenic substrate (DAB Chromogen Concentrate, BioLegend, CA), and the  
196 sections were counterstained with hematoxylin. Assays were performed in triplicate.

### 197 **Quantitative image analysis**

198 Each tissue of the TMA was photographed in triplicate with a magnification of 400X  
199 using a Nikon Microphot FXA. The digital images were analyzed with ImageJ as  
200 previously described [20] and the intensity of DAB signal was transformed to optical  
201 density values:  $OD = -\log(255 * \text{maximum level pixels} / \text{average pixels})$ . The integrated  
202 optical density (DOI) was calculated as  $OD \times \text{staining area}$ .

### 203 **Survival analysis**

204 After the treatment was completed, each patient was clinically evaluated every 3 or 6  
205 months by an experienced oncologist. Clinical data of the follow-up study were  
206 obtained from the patient's medical record. Additionally, a social worker performed  
207 phone calls and home visits to the patients every 6 months during the study. Survival  
208 analysis was performed on all patients who received the full treatment. The mean  
209 follow-up time was 60 months after the initial diagnosis. The patients designated as  
210 censored referred to patients who were lost to follow-up or who died from causes  
211 other than CC. Patients were considered lost when they did not attend medical  
212 appointments for disease control, were not found at home visits or did not answer  
213 phone calls. In this cohort, alive status was registered at the last follow-up, and death  
214 was caused by a primary tumor of CC as a main cause and confirmed by the medical  
215 record and the death certificate.

### 216 **Statistical analysis**



217 Data analysis was performed using SPSS software ver. 20. Receiver operating  
218 characteristic (ROC) curve analysis was performed, and the Youden index was used  
219 [21] to select the best cutoff points to distinguish tumors from nonsurviving and  
220 surviving patients or patients who survived with and without the disease using the  
221 expression values of glycolysis genes obtained by microarrays, qRT-PCR and WB.  
222 Expression values equal to or above the cutoff were considered upregulated, and  
223 those with values below the cutoff were considered downregulated.

224 The comparisons of the overall survival (OS) and disease-free survival (DFS) times  
225 between patients with upregulated and downregulated tumor genes were calculated  
226 by the Kaplan-Meier method and analyzed by the log-rank test. FIGO staging and  
227 glycolysis gene expression were included in univariate and multivariable Cox  
228 proportional hazards regression models. All tests were 2-sided, and  $p$  values less  
229 than 0.05 were considered statistically significant.

### 230 **3. Results**

#### 231 **Analysis of glycolytic gene expression in CC**

232 The expression of genes involved in glycolysis included in the HG-1.0ST microarray  
233 was analyzed in 103 cervical samples, including 76 CC, 10 HG-CINs and 17 HCE. As  
234 shown in Supplementary Figure 2, the 14 genes had significantly higher expression  
235 levels in the invading CCs than in the controls. Interestingly, we were able to confirm  
236 the difference between the invading cancers and the control group for 9 of these  
237 genes (SLC2A1, HK2, PFKP, ALDOA, GAPDH, PGK1, ENO, PKM and LDHA) in a  
238 second replicate with 42 invasive CCs and 12 controls, explored with a second  
239 microarray (HG-Focus; see Supplementary Figure 3), which included only 9 of the 14  
240 formerly explored genes. The samples were distributed into 3 groups, according to  
241 the expression profile, in the hierarchical clustering analysis: upregulation (group 3);  
242 intermediate regulation (group 2), which could be divided into the intermediate  
243 downregulation subgroup (group 2A) and the high intermediate upregulation

244 subgroup (group 2B); and downregulation (group 1). Group 3, in which most genes  
245 were overexpressed in all samples, was composed only of CC (n=28) and the 3 CC-  
246 derived cell lines (HeLa, SiHa and CaSki). In contrast, in group 1, in which the  
247 glycolysis genes were not overexpressed, almost all controls were found (n=13,  
248 76.5%), along with 4 of the 10 HG-CINs and a group of 15 CCs (19.7%). Group 2B,  
249 like group 3, was composed only of CC, while group 2A, more like group 1, was  
250 composed of HCE, HG-CINs and CCs (Figure 1, Supplementary Table 2). In the  
251 hierarchical grouping with the samples explored with HG-Focus, the distribution of  
252 the CCs and controls was very similar to the distribution obtained with the HG-1.0ST  
253 data (Supplementary Figure 4, Supplementary Table 2). Interestingly, the frequency  
254 of CCs with the highest clinical stage ( $\geq$  stage IIIA) predominated in group 3 (58.4%),  
255 while those with lower clinical stages ( $\leq$  stage IIB) were distributed uniformly among  
256 the 4 groups ( $p=5.0 \times 10^{-2}$ , chi-square test) (Supplementary Table 2).

### 257 **Effect of the gene expression of the 14 glycolysis genes on survival**

258 Interestingly, the expression profile of the 14 genes explored significantly influences  
259 the survival of patients with CC. Almost all women with CC (95%) whose tumors did  
260 not overexpress glycolysis genes (groups 1 and 2A) survived more than 5 years. In  
261 contrast, only 55% of patients with CC who had a glycolysis overexpression profile  
262 (groups 2B and 3) survived more than 5 years (Supplementary Figure 5A), although  
263 the difference between the two groups presented marginal statistical significance ( $p=$   
264  $5.0 \times 10^{-2}$ , log-rank test). To investigate which genes, contribute most significantly to  
265 that profile, survival was analyzed separately for each gene. Of the 14 genes  
266 identified with the HG-1.0ST microarray, the overexpression of only 8 of them  
267 (GAPDH, PGK1, TPI1P1, LDHA, ALDO, PFKP, ENO, and GPI) significantly reduced  
268 the % OS of the patients, with  $p$  values ranging from  $p=1.0 \times 10^{-4}$  to  $p=1.3 \times 10^{-2}$  in  
269 the log-rank test (Supplementary Figure 5B, C, D, E, F, G, H, and I). In addition, 5 of

270 them (GPI, PFKP, TPI1P1, GAPDH, and LDHA) were also associated with a  
271 significant reduction in % DFS (Supplementary Figure 5J-O). Of the 9 genes explored  
272 with HG-Focus, the gene expression levels of only 3 of them (ALDO, PGK1 and  
273 LDHA) were also significantly associated with the reduction in % OS ( $p = 3.3 \times 10^{-2}$ ,  $p$   
274  $= 9.0 \times 10^{-3}$ , and  $p = 5.0 \times 10^{-2}$ , respectively, log-rank test), and only 1 (LDHA;  $p = 3.0$   
275  $\times 10^{-2}$ , log-rank test) was also associated with DFS (see Supplementary Figure 6).

276 To determine whether the overexpression of these genes is independent of clinical  
277 stage, both variables were analyzed in a multivariate Cox proportional hazards  
278 model. Due to the small number of patients (n=61), they were grouped into two  
279 clinical groups, group 1 ( $\leq$  stage IIA, n=29) and group 2 ( $\geq$  stage IIB, n=32).  
280 Univariate analysis showed that the risk of death (hazard ratio, HR) of patients in  
281 group 2 was 3.4 (95% confidence interval (CI) = 1.1-10.4;  $p = 3.6 \times 10^{-2}$ , Cox test;  
282 Table 1) times higher than that of patients in group 1. As expected, the  
283 overexpression of 7 of the 8 genes conferred an increased risk of death, ranging from  
284 an HR of 2.8 (95% CI 1.0-7.6;  $p = 3.7 \times 10^{-2}$ ) for the PGK1 gene to an HR of 9.2  
285 (95% CI = 1.2-69.5;  $p = 3.7 \times 10^{-2}$ ) for the ENO1 gene (see Table 1).

286 However, when explored in conjunction with FIGO stage in multivariate analysis, only  
287 the LDHA gene with an HR of 3.0 (95% CI =1.1-8.2;  $p = 2.9 \times 10^{-2}$ ), the PFKP gene  
288 with an HR of 3.4 (95% CI = 1.1-10.5;  $p = 3.5 \times 10^{-2}$ ) and the pseudogene TPI1P1  
289 with an HR of 2.6 (95% CI = 1.0-7.9;  $p = 4.0 \times 10^{-2}$ ) conferred an increased risk of  
290 death, regardless of the FIGO clinical stage (Table 1). When DFS was analyzed, only  
291 LDHA with an HR of 2.7 (95% CI = 1.1-6.2;  $p = 2.9 \times 10^{-2}$ ) was independent of FIGO  
292 stage (Supplementary Table 3). LDHA experimental findings were also confirmed  
293 with the HG-Focus data (see Supplementary Tables 4 and 5).

#### 294 **Validation of LDHA and PFKP expression at the mRNA and protein levels**

295 The gene expression of the LDHA and PFKP genes was validated by qRT-PCR,  
296 WB, and IH. qRT-PCR confirmed that the expression of both genes was higher in the  
297 invading CCs (n=58) than in the HCE (n=19) However, the difference was much  
298 greater for the LDHA (FC=100.3;  $p=9.8 \times 10^{-8}$ , Mann-Whitney test) than for PFKP  
299 gene (FC=4.3,  $p=2.0 \times 10^{-6}$ , Mann-Whitney test, Figure 2A). Interestingly, we found  
300 that the expression levels of LDHA and PFKP were in average 1.6 and 1.7 times  
301 higher, respectively, in patients who died and/or presented active disease  
302 (recurrence) than in those who survived and were cured ( $p=9.0 \times 10^{-3}$  to  $p=2.8 \times 10^{-2}$ ;  
303 Mann-Whitney test, see Supplementary Table 6).

304 In addition, we confirmed the presence of the LDHA and PFKP proteins by WB in 69  
305 CC samples (15 of the 58 tumors explored for RNAs by qRT-PCR and 54 new CCs).  
306 LDHA and PFKP proteins were expressed at higher levels in the tumors of patients  
307 who did not survive (FC=14.9,  $p=3.0 \times 10^{-3}$  and FC=21.4,  $p=1.8 \times 10^{-3}$ , respectively;  
308 Mann-Whitney test) or who survived with the disease (FC=29.1,  $p=1.4 \times 10^{-4}$  and  
309 FC=17.2,  $p=1.7 \times 10^{-3}$ , respectively; Mann-Whitney test, Figure 2B-D) compared to  
310 tumors of patients who survived or disease-free survival more than 5 years.

311 Additionally, we analyzed the expression of these glycolytic enzymes by IH in HCE  
312 tissues (n=12), CC tissues (n=18) and metastatic tissues (n=6) preserved in paraffin  
313 from a new group of patients. LDHA and PFKP expression levels were significantly  
314 higher in tumor tissues than in HCE tissues (FC=4.3 for LDHA and FC=27.2 for  
315 PFKP); interestingly, the expression levels of both proteins were even higher in  
316 cervical metastases than in HCE (FC= 10.4 and 42.7, respectively) see  
317 Supplementary Table 7). This suggests that overexpression of LDHA and PFKP  
318 could be an important factor not only for tumor progression but also for the  
319 development of metastases. Interestingly, we reconfirmed that LDHA expression was  
320 higher in patients who had died and/or had active disease than in those who were

321 cured or survived more than 5 years (see Figure 3A-E and 3K). In contrast, there  
322 were not statistically significant differences in the PFKP expression between the  
323 groups (See Figure 3F-3J).

324 **The LDHA and PFKP genes, at the mRNA or protein level, are good markers of**  
325 **survival in CC**

326 At both the mRNA (n=58 CC) and protein (n=69) levels, we confirmed that the  
327 overexpression of LDHA and PFKP caused a significant decrease in OS and DFS  
328 during more than 5 years of follow-up; however, the results were stronger with the  
329 analysis of proteins. The analysis of mRNA is shown in Supplementary Table 8 and  
330 Figure 4A-C and 4G-I.

331 At the protein level, we found that the percentage of patients who survived decreased  
332 markedly when LDHA or PFKP proteins were overexpressed compared to the group  
333 in which these proteins were not overexpressed: 39% vs. 82% and 55% vs. 83%  
334 (both  $p < 0.05$ , log-rank test), respectively (see Figure 4D and 4E). Similar results  
335 were found when DFS was analyzed (Figure 4J and 4K). Interestingly, when both  
336 proteins were overexpressed (LDHA+/PFKP+), OS and DFS decreased dramatically  
337 to 29% and 23%, respectively; in contrast, when there was a single overexpressed  
338 protein, the survival rate was 64% in patients with and without the active disease, and  
339 when neither of these two proteins was expressed, the survival rate was 90% ( $p = 1.0$   
340  $\times 10^{-3}$  and  $p = 9.2 \times 10^{-5}$ , log-rank test; see Figure 4F and 4L).

341 With the univariate Cox analysis, the risk of dying was much higher with advanced  
342 FIGO stages than with the overexpression of each of the two markers (Table 2).  
343 However, when both markers were overexpressed, they confer a greater risk of death  
344 than FIGO [HR =7 (95% CI 1.6-31.1,  $p = 1.0 \times 10^{-2}$ ) versus HR=8.1 (95% CI=2.6-  
345 26.1;  $p = 4.3 \times 10^{-4}$ ]. Similar figures were seen for DFS (Table 2). Interestingly, in the

346 multivariate analysis, both genes remained, together with clinical stage, in the models  
347 of OS or DFS, indicating that they confer a risk of death independent of FIGO stage,  
348 even of similar magnitude or greater than that conferred by FIGO stage when both  
349 markers are overexpressed [OS:HR= 6.1 (95% CI=1.3-31.2;  $p=1.8 \times 10^{-2}$ ) vs. HR=  
350 6.6 (95% CI=1.3-32.1;  $p=2.5 \times 10^{-2}$ ) and [DFS:HR= 4.8 (95% CI=1.3-17.8;  $p=1.8 \times$   
351  $10^{-2}$ ) vs. HR=5.1 (95% CI=1.5-16.6;  $p=7.0 \times 10^{-3}$ )]. In fact, the HR increased  
352 exponentially as the level of expression of these markers increased, especially that of  
353 LDHA (Figure 2E). In 5 patients, the HR was well above the average HR of 4,  
354 reaching an HR value of 12.6 in the patient with an LDHA intensity of 83,538 OD  
355 units.

356

#### 357 **4. Discussion**

358 This is the first study in which it was identified that the overexpression of the LDHA  
359 and PFKP genes of the glycolysis pathway, both at the mRNA and protein levels, are  
360 good prognostic markers for OS and DFS in patients with CC, independent of FIGO  
361 stage. In fact, the risk of death when these two markers are elevated is equal to or  
362 greater than that of FIGO stage and increases exponentially with the protein level in  
363 the tumor, especially LDHA.

364 LDHA is part of the enzyme lactate dehydrogenase (LDH), which converts pyruvate  
365 into lactate. This enzyme is composed of 4 subunits, which can be A (LDHA), B  
366 (LDHB) or a combination of both [22]. Previous studies have shown that the isoforms  
367 in which the A subunit predominates favor the conversion of pyruvate into lactate,  
368 which stimulates glycolysis instead of oxidative phosphorylation. In contrast, when  
369 the B subunit predominates, the reverse happens: lactate is converted to pyruvate  
370 and metabolized by the Krebs/oxidative phosphorylation cycle [23]. In this work, we  
371 show that in CC, subunit A is overexpressed, which indicates that LDHA favors the

372 production of lactate and, with it, anaerobic metabolism, which can provide growth  
373 advantages to CC. On the other hand, PFKP, an isoform of the enzyme  
374 phosphofructokinase 1 (PFK-1), stimulates the activity of glycolysis by catalyzing the  
375 formation of fructose 1,6-bisphosphate from fructose 6-phosphate, the first rate-  
376 limiting step of glycolysis, and consequently the production of pyruvate. The  
377 simultaneous overexpression of PFKP and LDHA makes sense for the tumor,  
378 because the concerted action of the two enzymes in CC could rapidly metabolize  
379 pyruvate to lactate, producing an acceleration of glycolysis (10-100 times faster than  
380 total glucose oxidation in the mitochondria), achieving a large amount of anaerobic  
381 ATP. This favors tumor growth and the development of more aggressive invasive  
382 tumors.

383 No studies have assessed the influence of LDHA gene expression on the  
384 aggressiveness and survival of patients with CC. A couple of studies focused on  
385 LDHA as a part of the tumor gene expression profile associated with metastases [24]  
386 and resistance to chemotherapy [25], however, with contradictory results. In the  
387 profile associated with resistance to chemotherapy, the LDHA gene was upregulated,  
388 while in the profile associated with tumor metastases, the LDHA gene was  
389 downregulated. Interestingly, in this last study, tumors FIGO stage  $\leq$ IIB  
390 predominated, while in the first study, tumors FIGO stage  $\geq$ IIB predominated. This  
391 could suggest that in tumors of greater clinical stage and larger size in which hypoxia  
392 probably already exists, anaerobic metabolism predominates, while in early stages  
393 with smaller tumor sizes, aerobic metabolism predominates.

394 On the other hand, several studies have shown that increased serum LDH activity in  
395 patients with CC was associated with poor prognosis and decreased OS [26] and  
396 DFS [27], with an increased risk of death or recurrence, independent of other clinical  
397 factors [28]. However, the limitation of these studies was that they did not

398 demonstrate whether the quantified LDH levels came specifically from CC or from  
399 other tissues, since this enzyme is produced in several tissues.

400 In several types of tumors (such as squamous cell carcinoma of the skin and  
401 melanoma), increased expression of glycolysis genes is associated with increased  
402 tumor progression and decreased survival time in patients [29]. In addition, in many  
403 types of cancers, it has been observed through PET using fluorodeoxyglucose (FDG)  
404 that increased tumor glucose consumption is related to tumor aggressiveness [30].  
405 This phenomenon has also been demonstrated in animal models. For example, in  
406 two mouse models of triple-negative breast cancer (TNBC), 4T1 and Py8119,  
407 inhibition of glycolysis resulted in reduced tumor growth and metastases, which  
408 prolonged mouse survival [31]. In CC cell lines, LDHA silencing has been shown to  
409 decrease some neoplastic features *in vitro*. For example, HeLa and SiHa cells  
410 decreased colony formation and invasion capacity when the gene is silenced by miR-  
411 34a. Interestingly, when the activity of miRNA was finished, the activity of LDHA was  
412 reactivated at baseline levels favoring cell proliferation and invasion, demonstrating  
413 the importance of the expression of this gene for the tumor neoplastic phenotype  
414 [32].

415 Considering the importance of the neoplastic phenotype and tumor metabolism,  
416 LDHA could be a promising therapeutic target in CC. Several pharmacological  
417 inhibitors for LDHA have previously been reported for use in cancer, and there are  
418 currently several studies looking for more selective inhibitors [33] [34]. One of these  
419 compounds, gossypol, is being used in clinical trials for the treatment of malignant  
420 glioma (NCT00540722 and NCT00390403).

421 Although there are no PFKP reports in CC, this enzyme has been found to be  
422 overexpressed in HeLa cells [35] and related to the activation of tumor survival  
423 pathways via P44/42 mitogen-activated protein kinase (MAPK) [36]. Increased PFKP



424 expression and activity are related to neoplastic activity, metastasis production, and  
425 decreased survival in several types of cancer, primarily brain, kidney, and breast  
426 cancers [37] , [38]. Other studies have shown that the inhibition of PFKP with specific  
427 siRNAs in lung cancer cell lines [37] and murine tumor models of leukemia [39]  
428 decreased the expression of the enzyme and glycolysis, glucose, lactic acid and ATP  
429 concentrations in the supernatant of cell cultures, as well as tumor growth and  
430 progression.

431 Simultaneous overexpression of PFKP and LDHA has previously been described in  
432 breast cancer cell lines (MDA-MB-231), in which PFKP regulation also regulates  
433 lactate production. Interestingly, quercetin treatment impaired PFKP-LDHA signaling  
434 axis thereby inhibiting aerobic glycolysis and migration and cell invasion *in vitro* by  
435 80% [38], demonstrating that inhibition of both enzymes may be useful in the  
436 treatment of cancers in which these enzymes are activated, as in CC.

## 437 **5. Conclusions**

438 The overexpression of the glycolytic enzymes Lactate dehydrogenase A (LDHA) and  
439 phosphofructokinase platelet (PFKP) was associated with poor overall and disease-  
440 free survival in CC. Overexpression of LDHA and PFKP genes increased the risk of  
441 death from CC by 8 times, and this effect was independent of the FIGO clinical stage.  
442 In fact, the risk of death from CC increased exponentially as the expression level of  
443 these markers, mainly LDHA, increased. The measurement of gene expression of  
444 these two markers could be very useful to evaluate the clinical evolution and the risk  
445 of death from CC and to make better therapeutic decisions at the beginning of  
446 treatment.

## 447 **6. Abbreviations**

448 ADPGK: ADP-dependent glucokinase; ALDOA: aldolase; AUC: area under the curve;  
449 CC: cervical cancer; DFS: disease-free survival; EDARADD: EDAR-associated death

450 domain; ENO1: enolase 1; FIGO: International Federation of Gynecology and  
451 Obstetrics; FC: fold change; GPI: glucose-6-phosphate isomerase; GAPDH:  
452 glyceraldehyde-3-phosphate dehydrogenase; HG-CIN: high-grade cervical  
453 intraepithelial neoplasia; HK2: hexokinase 2; HR: hazard ratio; IH:  
454 immunohistochemistry; LDHA: lactate dehydrogenase A; OS: overall survival; PFKP:  
455 phosphofructokinase platelet; PGK1: phosphoglycerate kinase; PKM pyruvate kinase  
456 M; qRT-PCR: quantitative real-time-polymerase chain reaction; SLC2A1: solute  
457 carrier family 2 member 1; SLC9A1: solute carrier family 9 member A1; TP1P1:  
458 triosephosphate isomerase 1 pseudogene 1; WB: Western blotting.

## 459 **Declarations**

### 460 **7. Ethics approval and consent to participate**

461 The study protocol was approved by the Scientific and Ethics Committee of the  
462 General Hospital of Mexico (HGM) (approval number DIC/03/311/04/051). This study,  
463 all experiments and analyses were performed in accordance with the Declaration of  
464 Helsinki. Written informed consent was obtained from all participants before their  
465 inclusion in the study.

466

### 467 **8. Consent for publication**

468 Not applicable.

469

### 470 **9. Availability of data and materials**

471 The datasets GSE52904 and GSE39001 analyzed during the current study are  
472 available in the GEO database (<https://www.ncbi.nlm.nih.gov/geo/>) and are  
473 available in the NCBI-GEO repository.

474 <https://www.ncbi.nlm.nih.gov/geo/query/acc.cgi?acc=GSE52904>

475 <https://www.ncbi.nlm.nih.gov/geo/query/acc.cgi?acc=GSE39001>

476

477

## 478 **10. Competing interests**

479 All authors have completed the ICMJE uniform disclosure form at  
480 [www.icmje.org/coi\\_disclosure.pdf](http://www.icmje.org/coi_disclosure.pdf) and declare: no support from any organization for  
481 the submitted work; no financial relationships with any organizations that might have  
482 an interest in the submitted work in the previous three years; no other relationships or  
483 activities that could appear to have influenced the submitted work.

484

## 485 **11. Funding**

486 This research was conducted with support from the National Council on Science and  
487 Technology (Conacyt) under grant numbers 8135/A1, 24341 (to JB) and Laboratorio  
488 Huella Génica.

## 489 **12. Author contributions**

490 Study concept and design: J.B. and V.B.S. Performed the experiments: V.B.S.,  
491 A.G.C., A.M.E., I.M.M., A.A., and E.J. Analyzed the data and wrote the manuscript:  
492 V.B.S and J.B. Contributed reagents/materials: O.F.H., N.V.S. Analyzed and  
493 interpreted the image data: M.G.Z. Clinically evaluated CC patients: E.R.B.,  
494 M.E.S.N., S.B.M. Provided cervical specimens from these patients: E.R.B., S.B.M. All  
495 authors read and approved the manuscript. All authors gave final approval of the  
496 version to be published.

497

## 498 **13. Acknowledgments**

499 This study was performed as part of the requirements needed to obtain the Ph.D.  
500 degree of VB from Programa de Posgrado en Ciencias Biológicas, Universidad  
501 Nacional Autónoma de México (UNAM) and received a fellowship from CONACYT

502 (487890). We thank Dr. Valeria Barrón and Biologist Anabell Alvarado for training in  
503 some laboratory techniques.

## 504 **8. References**

505 1. Sung H, Ferlay J, Siegel RL, Laversanne M, Soerjomataram I, Jemal A, et al.  
506 Global Cancer Statistics 2020: GLOBOCAN Estimates of Incidence and Mortality  
507 Worldwide for 36 Cancers in 185 Countries. *CA: A Cancer Journal for Clinicians*.  
508 2021; 71:209–49.

509 2. Zhu Y, Wang Y, Hirschhorn J, Welsh KJ, Zhao Z, Davis MR, et al. Human  
510 Papillomavirus and Its Testing Assays, Cervical Cancer Screening, and Vaccination.  
511 In: *Advances in Clinical Chemistry*. Academic Press Inc.; 2017. p. 135–92.

512 3. Marth C, Landoni F, Mahner S, McCormack M, Gonzalez-Martin A, Colombo N.  
513 Cervical cancer: ESMO Clinical Practice Guidelines for diagnosis, treatment and  
514 follow-up. *Annals of Oncology*. 2017;28:iv72–83.

515 4. Friedlander M, Grogan M. Guidelines for the Treatment of Recurrent and  
516 Metastatic Cervical Cancer. *The Oncologist*. 2002;7:342–7.

517 5. Yoshida K, Kajiyama H, Utsumi F, Niimi K, Sakata J, Suzuki S, et al. A post-  
518 recurrence survival-predicting indicator for cervical cancer from the analysis of 165  
519 patients who developed recurrence. *Molecular and Clinical Oncology*. 2017.  
520 <https://doi.org/10.3892/mco.2017.1530>.

521 6. Duyn A, van Eijkeren M, Kenter G, Zwinderman K, Ansink A. *Acta Obstetrica et*  
522 *Gynecologica Scandinavica* Recurrent cervical cancer: detection and prognosis. *Acta*  
523 *Obstet Gynecol Scand*. 2002; 81:351–5.

- 524 7. Sepulveda AR, Hamilton SR, Allegra CJ, Grody W, Cushman-Vokoun AM,  
525 Funkhouser WK, et al. Molecular biomarkers for the evaluation of colorectal cancer:  
526 Guideline from The American Society for Clinical Pathology, College of American  
527 Pathologists, Association for Molecular Pathology, and the American Society of  
528 Clinical Oncology. *Journal of Clinical Oncology*. 2017; 35:1453–96.
- 529 8. Van Poznak C, Somerfield MR, Bast RC, Cristofanilli M, Goetz MP, Gonzalez-  
530 Angulo AM, et al. Use of biomarkers to guide decisions on systemic therapy for  
531 women with metastatic breast cancer: American Society of Clinical Oncology clinical  
532 practice guideline. *Journal of Clinical Oncology*. 2015; 33:2695–704.
- 533 9. Gatenby RA, Gillies RJ. Why do cancers have high aerobic glycolysis? *Nature*  
534 *Reviews Cancer*. 2004; 4:891–9.
- 535 10. Altenberg B, Greulich KO. Genes of glycolysis are ubiquitously overexpressed in  
536 24 cancer classes. *Genomics*. 2004; 84:1014–20.
- 537 11. Huang X-Q, Chen X, Xie X-X, Zhou Q, Li K, Li S, et al. Co-expression of CD147  
538 and GLUT-1 indicates radiation resistance and poor prognosis in cervical squamous  
539 cell carcinoma. *Int J Clin Exp Pathol*. 2014; 7:1651–66.
- 540 12. Huang X, Liu M, Sun H, Wang F, Xie X, Chen X, et al. Original Article HK2 is a  
541 radiation resistant and independent negative prognostic factor for patients with locally  
542 advanced cervical squamous cell carcinoma. 2015.
- 543 13. Cai L, Hu C, Yu S, Liu L, Yu X, Chen J, et al. Identification and validation of a six-  
544 gene signature associated with glycolysis to predict the prognosis of patients with  
545 cervical cancer. *BMC Cancer*. 2020;20.

- 546 14. Scher N, Castelli J, Depeursinge A, Bourhis J, Prior JO, Herrera FG, et al. (18F)-  
547 FDG PET/CT parameters to predict survival and recurrence in patients with locally  
548 advanced cervical cancer treated with chemoradiotherapy. *Cancer/Radiotherapie*.  
549 2018; 22:229–35.
- 550 15. Ke X, Shen L. Molecular targeted therapy of cancer: The progress and future  
551 prospect. *Frontiers in Laboratory Medicine*. 2017; 1:69–75.
- 552 16. Medina-Martinez I, Barrón V, Roman-Bassaure E, Juárez-Torres E, Guardado-  
553 Estrada M, Espinosa AM, et al. Impact of gene dosage on gene expression,  
554 biological processes and survival in cervical cancer: A genome-wide follow-up study.  
555 *PLoS ONE*. 2014;9.
- 556 17. Riis P. Thirty years of bioethics: the Helsinki Declaration 1964-2003. *New Rev*  
557 *Bioeth*. 2003;1:15–25.
- 558 18. Espinosa AM, Alfaro A, Roman-Basaure E, Guardado-Estrada M, Palma Í,  
559 Serralde C, et al. Mitosis Is a Source of Potential Markers for Screening and Survival  
560 and Therapeutic Targets in Cervical Cancer. *PLoS ONE*. 2013;8.
- 561 19. Bhatla N, Berek JS, Cuello Fredes M, Denny LA, Grenman S, Karunaratne K, et  
562 al. Revised FIGO staging for carcinoma of the cervix uteri. *International Journal of*  
563 *Gynecology and Obstetrics*. 2019; 145:129–35.
- 564 20. Ruifrok AC, Katz RL, Johnston A. Comparison of Quantification of Histochemical  
565 Staining By Hue-Saturation-Intensity (HSI) Transformation and Color-Deconvolution.  
566 2003.
- 567 21. Akobeng AK. Understanding diagnostic tests 3: Receiver operating characteristic  
568 curves. *Acta Paediatrica, International Journal of Paediatrics*. 2007; 96:644–7.

- 569 22. Kopperschliger G, Kirchberger J. Methods for the separation of lactate  
570 dehydrogenases and clinical significance of the enzyme. 1996.
- 571 23. Draoui N, Feron O. Lactate shuttles at a glance: From physiological paradigms to  
572 anti-cancer treatments. *DMM Disease Models and Mechanisms*. 2011;4:727–32.
- 573 24. Huang L, Zheng M, Zhou QM, Zhang MY, Jia WH, Yun JP, et al. Identification of  
574 a gene-expression signature for predicting lymph node metastasis in patients with  
575 early stage cervical carcinoma. *Cancer*. 2011;117:3363–73.
- 576 25. An JS, Huang MN, Song YM, Li N, Wu LY, Zhan QM. A preliminary study of  
577 genes related to concomitant chemoradiotherapy resistance in advanced uterine  
578 cervical squamous cell carcinoma. *Chinese Medical Journal*. 2013;126:4109–15.
- 579 26. Wang H, Wang M sen, Zhou YH, Shi JP, Wang WJ. Prognostic values of LDH  
580 and CRP in cervical cancer. *OncoTargets and Therapy*. 2020;13:1255–63.
- 581 27. Wang WJ, Li Y, Zhu J, Gao MJ, Shi JP, Huang YQ. Prognostic Values of  
582 Systemic Inflammation Response (SIR) Parameters in Resectable Cervical Cancer.  
583 Dose-Response. 2019;17.
- 584 28. Li J, Wu MF, Lu HW, Chen Q, Lin ZQ, Wang LJ. Pretreatment serum lactate  
585 dehydrogenase is an independent prognostic factor for patients receiving  
586 neoadjuvant chemotherapy for locally advanced cervical cancer. *Cancer Medicine*.  
587 2016;5:1863–72.
- 588 29. Kunkel M, Reichert TE, Benz P, Lehr HA, Jeong JH, Wieand S, et al.  
589 Overexpression of Glut-1 and increased glucose metabolism in tumors are  
590 associated with a poor prognosis in patients with oral squamous cell carcinoma.  
591 *Cancer*. 2003;97:1015–24.

- 592 30. Gambhir SS. Molecular imaging of cancer with positron emission tomography.  
593 Nature Reviews Cancer. 2002;2:683–93.
- 594 31. Li W, Tanikawa T, Kryczek I, Xia H, Li G, Wu K, et al. Aerobic Glycolysis Controls  
595 Myeloid-Derived Suppressor Cells and Tumor Immunity via a Specific CEBPB  
596 Isoform in Triple-Negative Breast Cancer. Cell Metabolism. 2018;28:87-103.e6.
- 597 32. Zhang R, Su J, Xue S-L, Yang H, Ju L-L, Ji Y, et al. HPV E6/p53 mediated down-  
598 regulation of miR-34a inhibits Warburg effect through targeting LDHA in cervical  
599 cancer. 2016.
- 600 33. Jafary F, Ganjalikhany MR, Moradi A, Hemati M, Jafari S. Novel Peptide  
601 Inhibitors for Lactate Dehydrogenase A (LDHA): A Survey to Inhibit LDHA Activity via  
602 Disruption of Protein-Protein Interaction. Scientific Reports. 2019;9.
- 603 34. Valvona CJ, Fillmore HL, Nunn PB, Pilkington GJ. The Regulation and Function  
604 of Lactate Dehydrogenase A: Therapeutic Potential in Brain Tumor. Brain Pathology.  
605 2016;26:3–17.
- 606 35. Moreno-Sánchez R, Marín-Hernández A, Gallardo-Pérez JC, Quezada H,  
607 Encalada R, Rodríguez-Enríquez S, et al. Phosphofructokinase type 1 kinetics,  
608 isoform expression, and gene polymorphisms in cancer cells. Journal of Cellular  
609 Biochemistry. 2012;113:1692–703.
- 610 36. Cardim Pires TR, Albanese JM, Schwab M, Murette A, Carvalho RS, Sola-Penna  
611 M, et al. Phosphofructokinase-P Modulates P44/42 MAPK Levels in HeLa Cells.  
612 Journal of Cellular Biochemistry. 2017;118:1216–26.
- 613 37. Shen J, Jin Z, Lv H, Jin K, Jonas K, Zhu C, et al. PFKP is highly expressed in  
614 lung cancer and regulates glucose metabolism. Cellular Oncology. 2020;43:617–29.



615 38. Umar SM, Kashyap A, Kahol S, Mathur SR, Gogia A, Deo SVS, et al. Prognostic  
616 and therapeutic relevance of phosphofructokinase platelet-type (PFKP) in breast  
617 cancer. *Experimental Cell Research*. 2020;396.

618 39. Qing Y, Dong L, Gao L, Li C, Li Y, Han L, et al. R-2-hydroxyglutarate attenuates  
619 aerobic glycolysis in leukemia by targeting the FTO/m6A/PFKP/LDHB axis. *Molecular*  
620 *Cell*. 2021;81:922-939.e9.

621

622

623

624

625

626

627

628

629

630

631

632

633

634

635

636

637

638

639

640

641

642

643

644

645

646

647

648

649

650

651

652

653

654

655

656

657 **Figure legends**

658

659 **Figure 1. Unsupervised hierarchical cluster analysis of 14 glycolytic genes in**

660 **CC.** The segregation of HCE (n=17), HG-CINs (n=10) and CC (n=76) is shown  
661 according to the expression profile of 14 glycolytic genes. Four groups were  
662 distinguished: the first group with downregulation of the genes (Group 1), the second  
663 and third groups (Groups 2A and 2B) with intermediate expression levels, and the  
664 fourth group with an upregulation profile (Group 3). Each column represents a  
665 sample, and each line represents a glycolytic gene. The number at the end of the CC  
666 sample name (1 to 4) indicates the FIGO I, II, III, and IV stages of the patient. The  
667 length and subdivision of the arms represent the relationship between the samples  
668 based on the intensity of gene expression: red for upregulation, blue for  
669 downregulation, and white for no change in expression. The analysis was performed  
670 with the expression values expressed in logarithmic form (base 2).

671 **Figure 2. Validation of LDHA and PFKP expression in CC.** The expression of

672 LDHA and PFKP in CC was validated at the mRNA and protein levels by qRT-PCR  
673 and WB, respectively. Panel A shows the qRT-PCR analysis of LDHA and PFKP  
674 mRNA in 58 CCs. The expression was normalized with respect to the internal control  
675 (RPS13) and the control group by the double delta method using the final formula ( $2^{-\Delta\Delta CT}$ ).  
676 Panels B and C show representative images of WB of LDHA and PFKP  
677 expression, respectively: surviving patients, nonsurviving patients, no recurrence  
678 patients and recurrence patients. The molecular weight of the proteins is shown in  
679 kilodaltons (kDa). The protein  $\beta$ -actin was used as an internal control. Panel D show  
680 the mean expression  $\pm$  SD of LDHA and PFKP proteins between patients with CC  
681 who survived (white bars, n=47) vs. those who died (gray bars, n=22). The intensity  
682 of LDHA and PFKP was normalized with respect to  $\beta$ -actin. The expression is shown  
683 as optical density (OD) units. The significant differences between the groups were

684 calculated with the Mann–Whitney U test, and  $p < 0.05$  was considered statistically  
685 significant. Panel E shows the hazard ratio (HR) analysis in relation to LDHA and  
686 PFKP protein expression in CC. The risk of dying from CC increases exponentially as  
687 protein expression (OD) increases, but it is more evident with the expression of  
688 LDHA (dark blue circles represent nonsurviving patients, while light blue circles  
689 represent surviving patients) than PFKP (dark red circles represent nonsurviving  
690 patients, while light red circles represent surviving patients).SD= standard deviation.

691 **Figure 3. Expression of LDHA and PFKP proteins by IH.** The expression of the  
692 LDHA and PFKP proteins was determined by immunohistochemistry (IH) and  
693 compared between patients who survived without the disease (No recurrence) and  
694 patients who died and/or remained with the disease (Recurrence). Histological  
695 analysis included 12 controls, 18 CC and 6 metastatic tissues. Panels A-E show the  
696 detection of the LDHA protein, and panels F-J show the detection of the PFKP  
697 protein with a specific antibody. A representative image of the experiments is shown.  
698 The specific signal for proteins is shown in brown color and counterstained with  
699 hematoxylin in violet color. Original amplification 400x; the bars measure 20  $\mu$ m.  
700 Panels K show the quantitative analysis of LDHA and PFKP expression in CC tissues  
701 of patients No recurrence vs recurrence determined by IH. The average optical  
702 density and staining area of LDHA and PFKP (DOI) in the tissues were considered.  
703 The mean  $\pm$  SD of three independent experiments is shown. Mann–Whitney test was  
704 performed to assess the difference between the groups, and  $p < 0.05$  was  
705 considered statistically significant. SD= standard deviation.

706 **Figure 4. Kaplan–Meier survival curves of LDHA and PFKP.** OS analysis and  
707 according to the expression of LDHA and PFKP by qRT–PCR (panels A-C) and WB  
708 (panels D-F). DFS analysis according to the expression of LDHA and PFKP by qRT–  
709 PCR (panels G-I) and WB (panels J-L). The cutoff values were calculated using ROC

710 curves. In the overall survival analysis, the red lines include the values of  
711 nonsurviving patients, while the blue line includes the values of surviving patients. In  
712 the disease-free survival analysis, the red lines contain the values of nonsurviving  
713 patients and surviving patients with the disease, while the blue lines include the  
714 values of surviving cured patients. Censored patients are shown marked with vertical  
715 bars. The p value was calculated with the log-rank test.

716 **Supplementary Figure 1. Analysis workflow of 188 cervical cancer cases.** Figure  
717 shows the analysis workflow of the 188 CC cases explored in this study. The  
718 expression of 14 genes involved in glycolysis were investigated in 76 CC with HG-  
719 1.0ST microarray and 9 genes were explored in 42 CC with HG-Focus, with 21 CCs  
720 in common. Five-year survival was investigated in 61 of 76 patients with CC explored  
721 with HG 1.0 ST and 36 of 42 patients investigated with HG-Focus. The expression of  
722 the LDHA and PFKP was validated by qRT-PCR, WB and IH. All patients explored  
723 by qRT-PCR (n=58) and 59 of 69 patients studied by WB were included in the follow-  
724 up studies, with 15 CCs in common. The protein expression of LDHA and PFKP was  
725 determined in 18 CC tissues by IH.

726 **Supplementary Figure 2. Expression of glycolytic genes in CC. Box plots of the**  
727 **expression of 14 genes of the glycolytic pathway obtained with the HG-1.0ST**  
728 **microarray.** The analysis was performed on 17 controls, 10 HG-CIN patients and 76  
729 CC patients. The graphs show the value of the normalized fluorescence intensity (log  
730 2) for each gene. The upper and lower limits of the boxes represent the 75<sup>th</sup> and 25<sup>th</sup>  
731 percentiles, respectively. The mean is shown as the center black line inside the  
732 boxes, and the median is shown as "+". The whiskers represent the maximum and  
733 minimum values that lie within 1.5 times the interquartile range from the ends of the  
734 frame. Values outside this range are displayed as black dots. The *Mann-Whitney U*

735 *test* was used to determine the significant differences between the groups,  $**p < 0.05$ ,  
736  $*** p < 0.005$ .

737 **Supplementary Figure 3. Box plots of the expression of 9 genes of the**  
738 **glycolytic pathway obtained with the HG-Focus microarray.** The analysis was  
739 performed on 12 controls and 76 CC16+ patients. The graphs show the value of the  
740 normalized fluorescence intensity (log 2) for each gene. The upper and lower limits of  
741 the boxes represent the 75<sup>th</sup> and 25<sup>th</sup> percentiles, respectively. The mean is shown  
742 as the center black line inside the boxes, and the median is shown as "+". The  
743 whiskers represent the maximum and minimum values that lie within 1.5 times the  
744 interquartile range from the ends of the frame. Values outside this range are  
745 displayed as black dots. The *Mann–Whitney U test* was used to determine the  
746 significant differences between the groups,  $**p < 0.05$ ,  $*** p < 0.005$ .

747 **Supplementary Figure 4. Unsupervised hierarchical cluster analysis of 9**  
748 **glycolytic genes in CC.** The segregation of 12 controls and 42 CC HPV16+ is  
749 shown according to the expression profile of 9 glycolytic genes explored with the HG-  
750 Focus microarray, and 4 groups were distinguished: a first group with downregulation  
751 of the genes (Group 1), the second and third groups (Groups 2A and 2B) with  
752 intermediate expression levels and the fourth group with an upregulation profile  
753 (Group 3). Each column represents a sample, and each line represents a glycolytic  
754 gene. The number at the end of the CC sample name (1 to 4) indicates the FIGO I, II,  
755 III, and IV stages of the patient. The length and subdivision of the arms represent the  
756 relationship between the samples based on the intensity of gene expression: red for  
757 upregulation, blue for downregulation, and white for no change in expression. The  
758 analysis shows gene expression in log 2.

759

760 **Supplementary Figure 5.** Kaplan–Meier survival curves of HG-1.0 ST microarray.  
761 The OS (A–I panels) and DFS (J–O panels) of patients with CC were analyzed  
762 according to the expression of the 14 glycolytic genes obtained with the HG-1.0ST  
763 microarray using the Kaplan–Meier method with the SPSS program. The cutoff  
764 values of the expression of each gene that best separated the women were  
765 calculated using ROC curves. In the overall survival analysis, the red lines include  
766 the values of nonsurviving patients, while the blue line includes the values of  
767 surviving patients. In the disease-free survival analysis, the red lines contain the  
768 values of nonsurviving patients and surviving patients with the disease, while the blue  
769 lines include the surviving cured patients. The mean follow-up time of patients 60  
770 months after the initial diagnosis. Censored patients are shown marked with vertical  
771 bars. The *p value* was calculated with the log-rank test.

772 **Supplementary Figure 6. Kaplan–Meier survival curves.** The OS (A–J panels) and  
773 DFS (K panel) of patients with CC were analyzed according to the expression of the  
774 9 glycolytic genes obtained with the HG-Focus microarray using the Kaplan–Meier  
775 method. The cutoff values of the expression of each gene that best separated the  
776 patients were calculated using ROC curves. In the overall survival analysis, the red  
777 lines include the values of nonsurviving patients, while the blue line includes the  
778 values of surviving patients. In the disease-free survival analysis, the red lines  
779 contain the values of nonsurviving patients and surviving patients with the disease,  
780 while the blue lines include the values of surviving cured patients. Censored patients  
781 are shown marked with vertical bars. The *p value* was calculated with the log-rank  
782 test.

783  
784  
785  
786  
787  
788

789

790

791

**Table 1.** Univariate and multivariate analyses for the overall survival of patients with CC with Cox proportional hazards models including the expression of glycolytic genes explored with HG 1.0 ST microarray and FIGO clinical stage.

| Covariates       | n  | Univariate analysis <sup>e</sup> |          |                      | Multivariate analysis <sup>f</sup> |                      |                       |
|------------------|----|----------------------------------|----------|----------------------|------------------------------------|----------------------|-----------------------|
|                  |    | HR <sup>b</sup>                  | 95% CI   | p <sup>c</sup>       | HR <sup>b</sup>                    | 95% CI               | p <sup>c</sup>        |
| <b>FIGO</b>      |    |                                  |          |                      |                                    |                      |                       |
| ≤IIA             | 29 | 1                                |          |                      | 1.0                                |                      |                       |
| ≥IIB             | 32 | 3.4                              | 1.1-10.4 | $3.6 \times 10^{-2}$ | 3.3 <sup>d</sup>                   | 1.1-9.6 <sup>d</sup> | $3.5 \times 10^{-2d}$ |
| <b>LDHA</b>      |    |                                  |          |                      |                                    |                      |                       |
| Low <sup>a</sup> | 40 | 1.0                              |          |                      | 1.0                                |                      |                       |
| High             | 21 | 3.1                              | 1.1-8.3  | $2.7 \times 10^{-2}$ | 3.0                                | 1.1-8.19             | $2.9 \times 10^{-2}$  |
| <b>PFKP</b>      |    |                                  |          |                      |                                    |                      |                       |
| Low              | 32 | 1.0                              |          |                      | 1.0                                |                      |                       |
| High             | 29 | 3.5                              | 1.1-10.9 | $3.0 \times 10^{-2}$ | 3.4                                | 1.1-10.5             | $3.5 \times 10^{-2}$  |
| <b>TPI1P1</b>    |    |                                  |          |                      |                                    |                      |                       |
| Low              | 52 | 1.0                              |          |                      | 1.0                                |                      |                       |
| High             | 9  | 3.7                              | 1.3-10.9 | $1.5 \times 10^{-3}$ | 2.6                                | 0.8-7.87             | $4.0 \times 10^{-2}$  |
| <b>GAPDH</b>     |    |                                  |          |                      |                                    |                      |                       |
| Low              | 54 | 1.0                              |          |                      | 1.0                                |                      |                       |
| High             | 7  | 5.6                              | 1.9-16.3 | $2.0 \times 10^{-3}$ | 4.0                                | 1.3-12.3             | $5.2 \times 10^{-2}$  |
| <b>GPI</b>       |    |                                  |          |                      |                                    |                      |                       |
| Low              | 19 | 1.0                              |          |                      | 1.0                                |                      |                       |
| High             | 42 | 8.5                              | 1.1-64.1 | $3.9 \times 10^{-2}$ | 7.9                                | 1.0-60.0             | $5.6 \times 10^{-2}$  |
| <b>ENO</b>       |    |                                  |          |                      |                                    |                      |                       |
| Low              | 21 | 1.0                              |          |                      | 1.0                                |                      |                       |
| High             | 40 | 9.2                              | 1.2-69.5 | $3.2 \times 10^{-2}$ | 7.3                                | 0.9-56.4             | $5.6 \times 10^{-2}$  |
| <b>PGK1</b>      |    |                                  |          |                      |                                    |                      |                       |
| Low              | 44 | 1.0                              |          |                      | 1.0                                |                      |                       |
| High             | 17 | 2.8                              | 1.0-7.6  | $3.7 \times 10^{-2}$ | 2.3                                | 0.9-6.2              | $1.1 \times 10^{-1}$  |
| <b>ALDOA</b>     |    |                                  |          |                      |                                    |                      |                       |
| Low              | 15 | 1.0                              |          |                      | 1.0                                |                      |                       |
| High             | 46 | 5.8                              | 0.7-44.3 | $8.7 \times 10^{-2}$ | 4.9                                | 0.6-37.6             | $1.2 \times 10^{-1}$  |

792

CI= confidence interval; HR= hazard ratio; FIGO stage=International Federation of Gynecology and Obstetrics stage.

793

794

a. Optimal cutoff values were selected according to the ROC analysis in relation to fold changes in genes expression obtained with the Human Gene 1.0 ST microarray.

795

796

b. Adjusted hazard ratio.

797

c. Cox proportional hazards model.

798

d. These calculations were obtained in the multivariate analysis performed with LDHA. The values of FIGO obtained in the multivariate analysis with the other markers are not shown but are similar to these values.

799

800

e. Univariate analysis was performed considering one variable for the analysis.

801

f. Multivariate analysis was performed considering gene expression and FIGO stage for the analysis.

802

803

804

805

806

807

808

809

810

811

812

813

814

815

816

817 **Table 2.** Hazard ratio analyses of patients with CC with Cox proportional hazards  
 818 models including the expression of the glycolytic proteins LDHA and PFKP and FIGO  
 819 clinical stage

| Covariates                   | Univariate analysis <sup>e</sup> |                 |           |                        | Multivariate analysis <sup>f</sup> |          |                        |
|------------------------------|----------------------------------|-----------------|-----------|------------------------|------------------------------------|----------|------------------------|
|                              | n                                | HR <sup>c</sup> | 95% CI    | p <sup>d</sup>         | HR <sup>c</sup>                    | 95% CI   | p <sup>d</sup>         |
| <b>Overall Survival</b>      |                                  |                 |           |                        |                                    |          |                        |
| LDHA                         |                                  |                 |           |                        |                                    |          |                        |
| FIGO $\leq$ IIA <sup>a</sup> | 27                               | 1               |           |                        | 1                                  |          |                        |
| FIGO $\geq$ IIB              | 32                               | 7.0             | 1.6-31.3  | 1.0 X 10 <sup>-2</sup> | 5.5                                | 1.2-25.2 | 2.7 x 10 <sup>-2</sup> |
| Low <sup>b</sup>             | 43                               | 1               |           |                        | 1                                  |          |                        |
| High                         | 16                               | 4               | 1.4-11.1  | 8.0 X 10 <sup>-3</sup> | 2.8                                | 1.0-7.9  | 5.2 x 10 <sup>-2</sup> |
| PFKP                         |                                  |                 |           |                        |                                    |          |                        |
| FIGO $\leq$ IIA <sup>a</sup> | 27                               | 1               |           |                        | 1                                  |          |                        |
| FIGO $\geq$ IIB              | 32                               | 7.0             | 1.6-31.3  | 1.0 X 10 <sup>-2</sup> | 6.9                                | 1.5-30.5 | 1.1 x 10 <sup>-2</sup> |
| Low <sup>b</sup>             | 33                               | 1               |           |                        | 1                                  |          |                        |
| High                         | 26                               | 3.3             | 1.1-10.55 | 4.0 X 10 <sup>-2</sup> | 3.2                                | 1.0-10.2 | 4.6 x 10 <sup>-2</sup> |
| LDHA/PFKP <sup>g</sup>       |                                  |                 |           |                        |                                    |          |                        |
| FIGO $\leq$ IIA <sup>a</sup> | 27                               | 1               |           |                        | 1                                  |          |                        |
| FIGO $\geq$ IIB              | 32                               | 7.0             | 1.6-31.3  | 1.0 X 10 <sup>-2</sup> | 6.1                                | 1.3-31.2 | 1.8 x 10 <sup>-2</sup> |
| Low <sup>b</sup>             | 23                               | 1               |           |                        | 1                                  |          |                        |
| One high                     | 25                               | 2.2             | 0.65-7.6  | 2.0 x 10 <sup>-1</sup> | 5.3                                | 1.0-25.6 | 4.0 x 10 <sup>-2</sup> |
| Two high                     | 11                               | 8.1             | 2.6-26.10 | 4.3 x 10 <sup>-4</sup> | 6.6                                | 1.3-32.1 | 2.5 x 10 <sup>-2</sup> |
| <b>Disease-free survival</b> |                                  |                 |           |                        |                                    |          |                        |
| LDHA                         |                                  |                 |           |                        |                                    |          |                        |
| FIGO $\leq$ IIA <sup>a</sup> | 27                               | 1               |           |                        | 1                                  |          |                        |
| FIGO $\geq$ IIB              | 32                               | 6.4             | 1.9-21.7  | 3.0 X 10 <sup>-3</sup> | 4.6                                | 1.3-16.2 | 1.7 x 10 <sup>-2</sup> |
| Low <sup>b</sup>             | 43                               | 1               |           |                        | 1                                  |          |                        |
| High                         | 16                               | 4.5             | 1.9-10.8  | 1.0 X 10 <sup>-3</sup> | 3.2                                | 1.3-7.6  | 1.2 x 10 <sup>-2</sup> |
| PFKP                         |                                  |                 |           |                        |                                    |          |                        |
| FIGO $\leq$ IIA <sup>a</sup> | 27                               | 1               |           |                        | 1                                  |          |                        |
| FIGO $\geq$ IIB              | 32                               | 6.4             | 1.9-21.7  | 3.0 X 10 <sup>-3</sup> | 6.1                                | 1.7-20.6 | 4.0 x 10 <sup>-2</sup> |
| Low <sup>b</sup>             | 28                               | 1               |           |                        | 1                                  |          |                        |
| High                         | 31                               | 3.2             | 1.2-8.2   | 1.8 X 10 <sup>-2</sup> | 2.9                                | 1.1-7.5  | 2.8 x 10 <sup>-2</sup> |
| LDHA/PFKP <sup>g</sup>       |                                  |                 |           |                        |                                    |          |                        |
| FIGO $\leq$ IIA <sup>a</sup> | 27                               | 1               |           |                        | 1                                  |          |                        |
| FIGO $\geq$ IIB              | 32                               | 6.4             | 1.9-21.7  | 3.0 X 10 <sup>-3</sup> | 4.8                                | 1.3-17.9 | 1.8 x 10 <sup>-2</sup> |
| Low <sup>b</sup>             | 23                               | 1               |           |                        | 1                                  |          |                        |
| One high                     | 25                               | 2.2             | 0.7-7.6   | 2.0 x 10 <sup>-1</sup> | 2.7                                | 0.8-9.5  | 1.1 x 10 <sup>-1</sup> |
| Two high                     | 11                               | 8.1             | 2.5-26.1  | 4.3 x 10 <sup>-4</sup> | 5.1                                | 1.5-16.6 | 7.0 x 10 <sup>-3</sup> |

820 a. FIGO stage analysis

821 b. Optimal cutoff values were selected according to the ROC analysis in relation to the expression of LDHA or  
 822 PFKP obtained with WB.

823 c. Adjusted hazard ratio.

824 d. Cox proportional hazards model.

825 e. Univariate analysis was performed considering one variable for the analysis.

826 f. Multivariate analysis was performed considering gene expression and FIGO stage for the analysis.

827 g. Low= downregulation of two genes; One high= upregulation of one gene; Two high= upregulation of LDHA and  
 828 PFKP.

829 CI= confidence interval; HR = hazard ratio; FIGO stage= International Federation of Gynecology and Obstetrics  
 830 stage

831

832

833

834

835

836

837



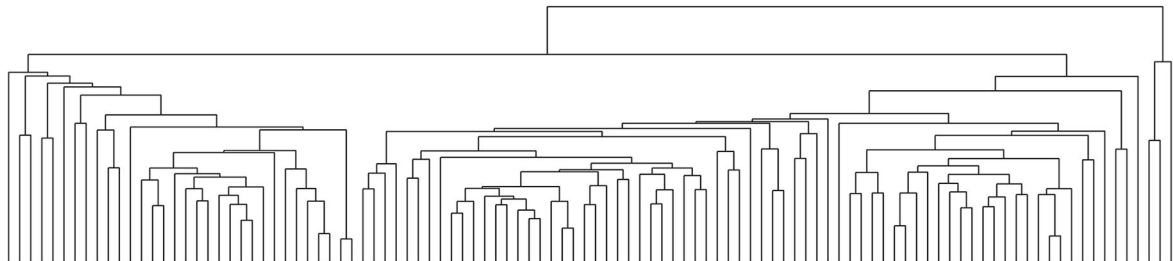

CC253-2  
 C1N006  
 HCE033  
 CC456-2  
 CC466-1  
 CC102-1  
 CC124-1  
 CC075-1  
 CC271-2  
 CC323-3  
 CC469-4  
 C1N002  
 HCE041  
 HCE010  
 HCE007  
 CC221-1  
 HCE036  
 C1N012  
 HCE038  
 CC478-1  
 HCE039  
 C1N377  
 HCE019  
 CC087-1  
 CC330-1  
 CC268-2  
 HCE024  
 CC339-1  
 HCE013  
 HCE011  
 HCE012  
 HCE021  
 C1N350  
 CC313-3  
 CC163-1  
 CC230-1  
 CC244-2  
 CC322-3  
 CC265-1  
 HCE043  
 CC116-1  
 HCE005  
 HCE020  
 CC437-2  
 CC121-1  
 HCE045  
 CC457-3  
 C1N042  
 C1N334  
 C1N016  
 C1N015  
 C1N018  
 CC495-2  
 CC412-1  
 CC426-2  
 CC486-1  
 CC189-1  
 CC248-1  
 CC298-3  
 CC156-3  
 CC154-3  
 CC157-4  
 CC386-1  
 CC336-1  
 CC081-1  
 CC274-1  
 CC462-4  
 CC369-1  
 CC468-1  
 CC326-2  
 CC444-2  
 CC256-2  
 CC345-2  
 CC476-1  
 CC307-2  
 CC483-4  
 CC494-3  
 CC365-3  
 C1N194-2  
 CC158-4  
 CC409-1  
 CC455-2  
 CC260-2  
 CC072-1  
 CC378-1  
 CC411-3  
 CC240-3  
 CC315-3  
 CC390-1  
 CC489-3  
 CC208-1  
 CC392-3  
 CC425-1  
 CC282-3  
 CC388-3  
 CC496-3  
 CC198-3  
 CC458-2  
 CC487-2  
 C6K7-2  
 CC035-1  
 CC380-3  
 CC326-2  
 SiHa  
 CC324-1  
 HeLa

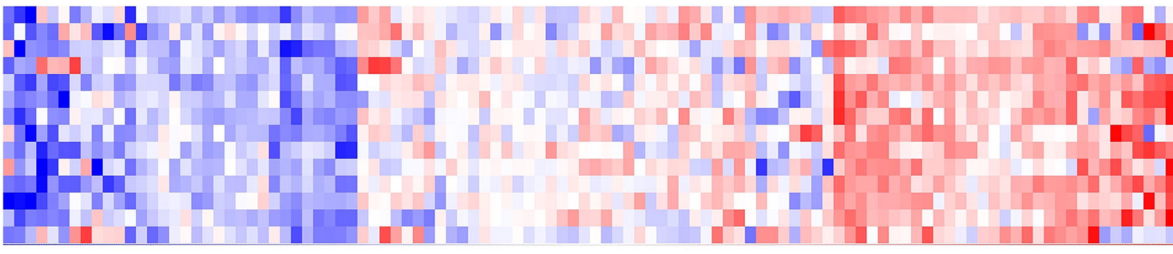

SLC2A1  
 ADPGK  
 ALDOA  
 EDARADD  
 ENO1  
 GAPDH  
 GPI  
 HK2  
 LDHA  
 PFKP  
 PGK1  
 PKM  
 TPI1P1  
 SLC9A1

Group 1

Group 2A

Group 2B

Group 3

**A**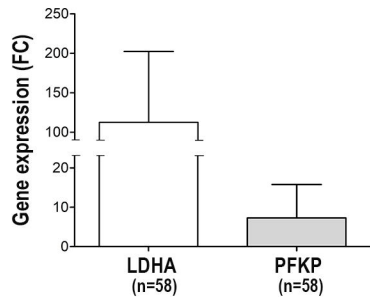**B**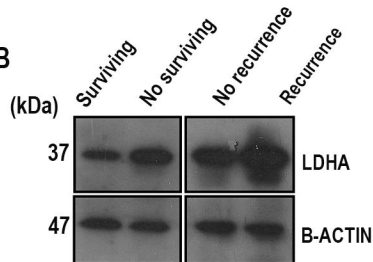**C**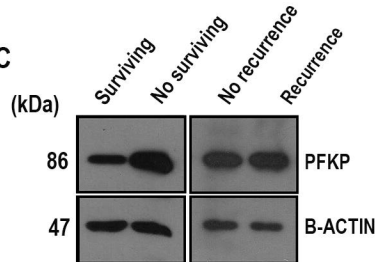**D**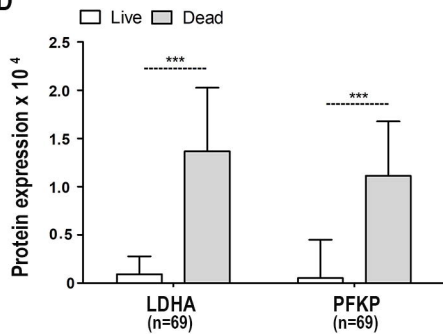**E**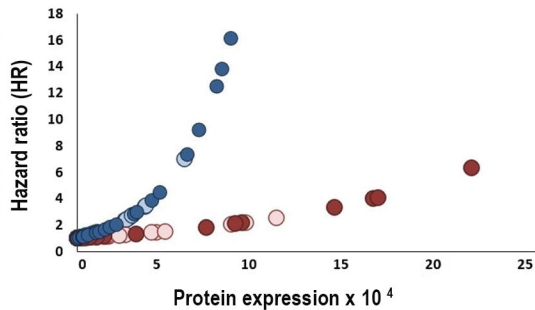

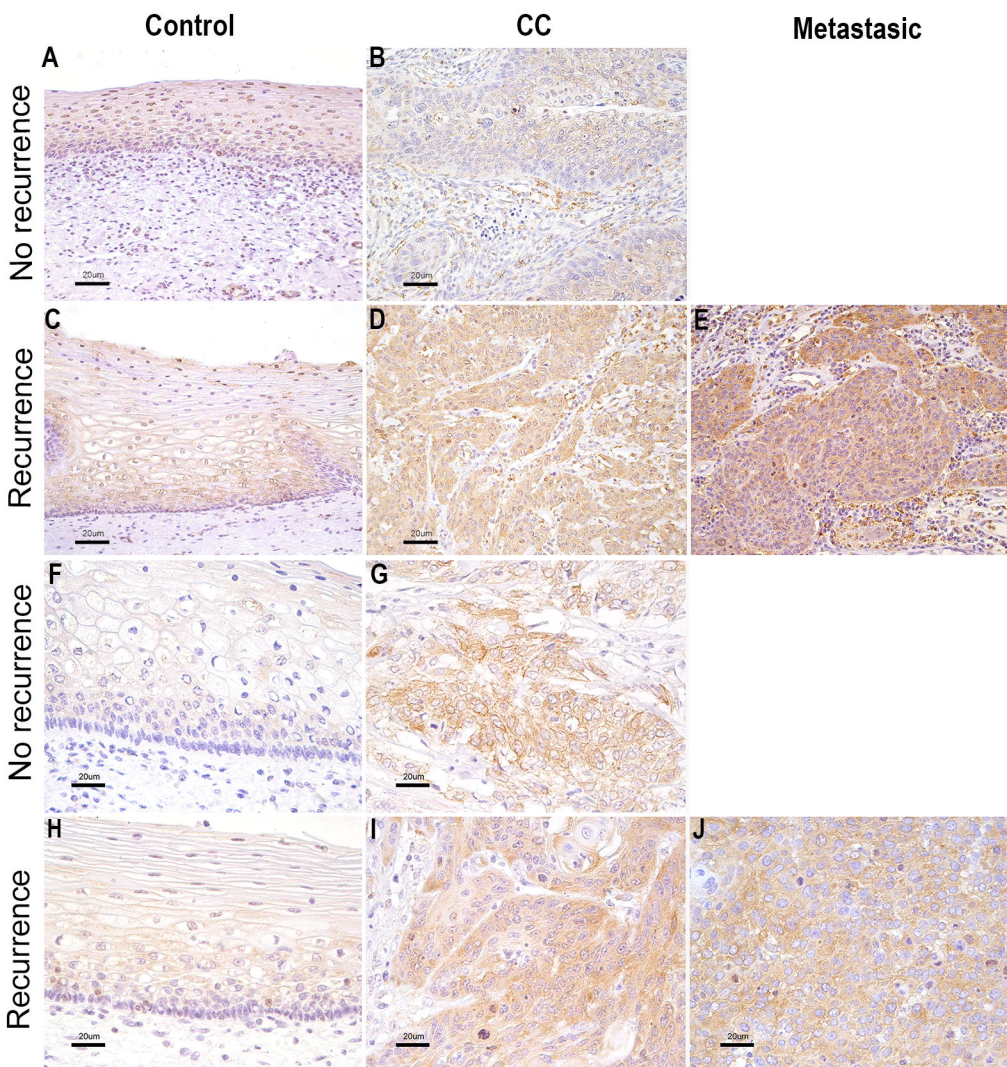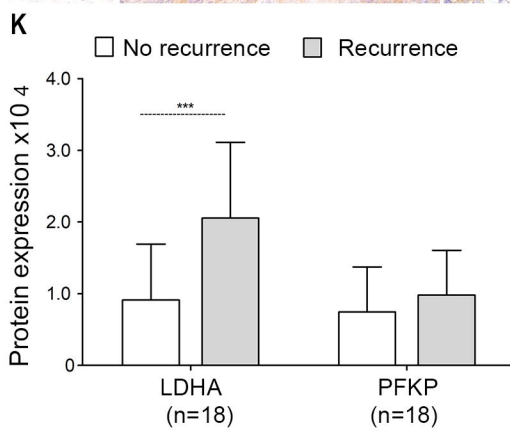

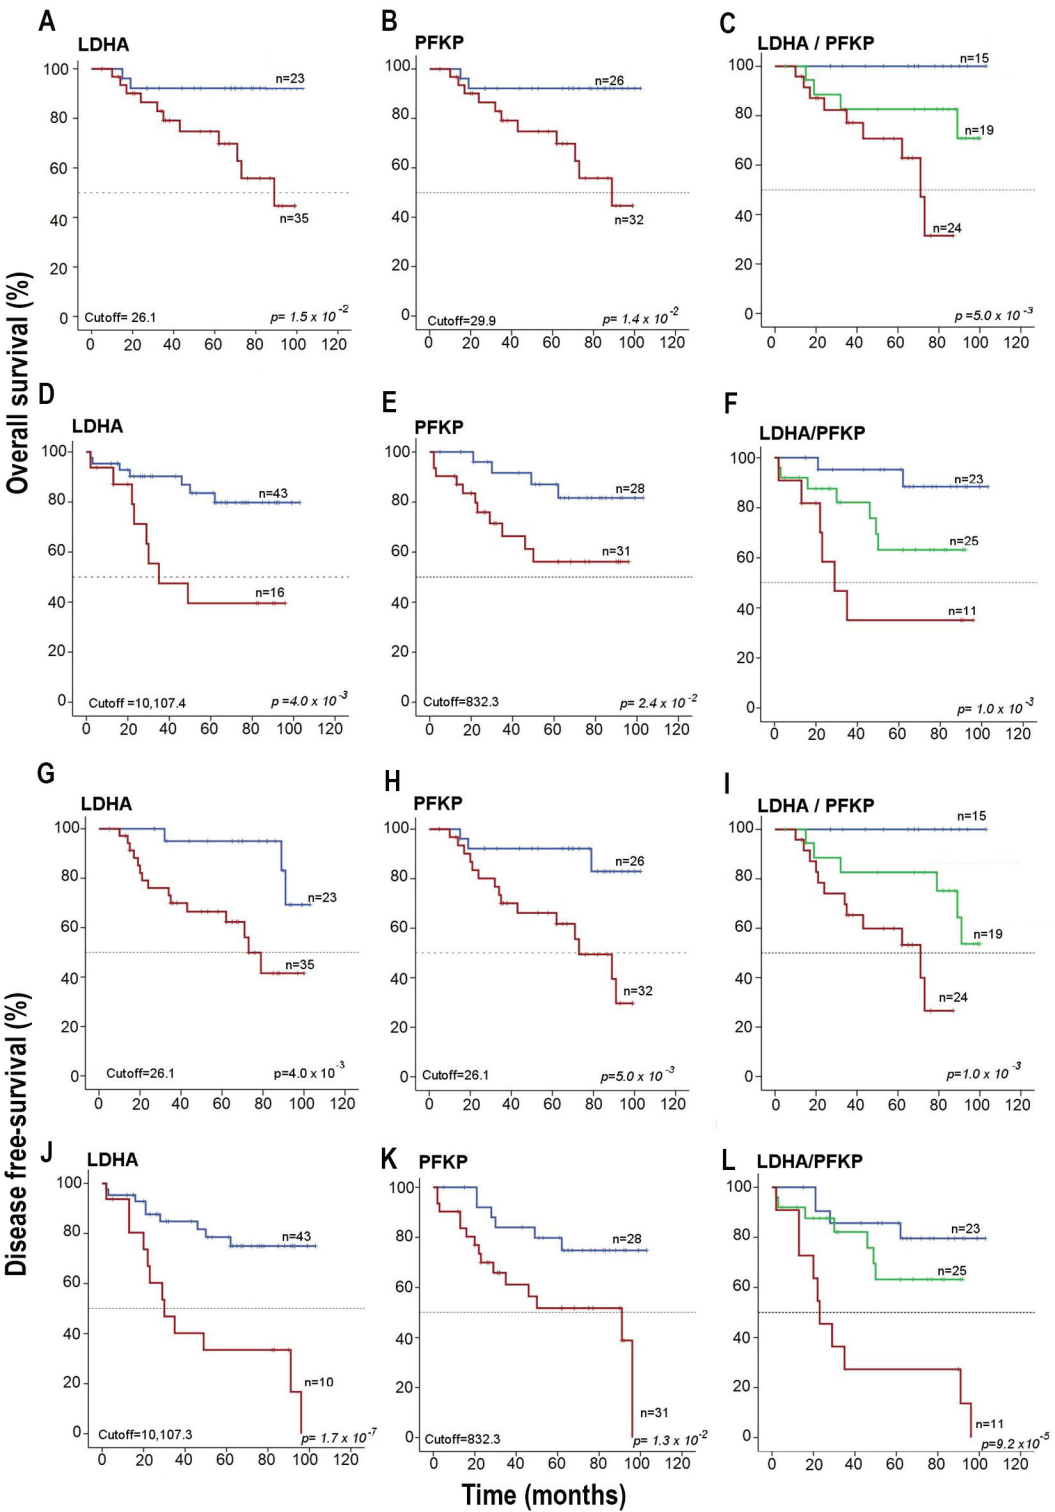

Source: https://www.medrxiv.org/content/10.1101/2022.08.02.22277946v1.full.pdf
